# Supplementary material for: Technical note: Nighttime OH and HO 2 chemical equilibria in the mesosphere–lower thermosphere
Source: Copernicus journal article supplement (doi:10.5194/acp-24-10965-2024), 2024-09-27
Supplement: Supplementary file 1 [file acp-24-10965-2024-supplement.pdf]

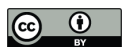

*Supplement of*

## **Technical note: Nighttime OH and HO<sub>2</sub> chemical equilibria in the mesosphere–lower thermosphere**

**Mikhail Yu. Kulikov et al.**

*Correspondence to:* Mikhail Yu. Kulikov ([mikhail\\_kulikov@mail.ru](mailto:mikhail_kulikov@mail.ru))

The copyright of individual parts of the supplement might differ from the article licence.

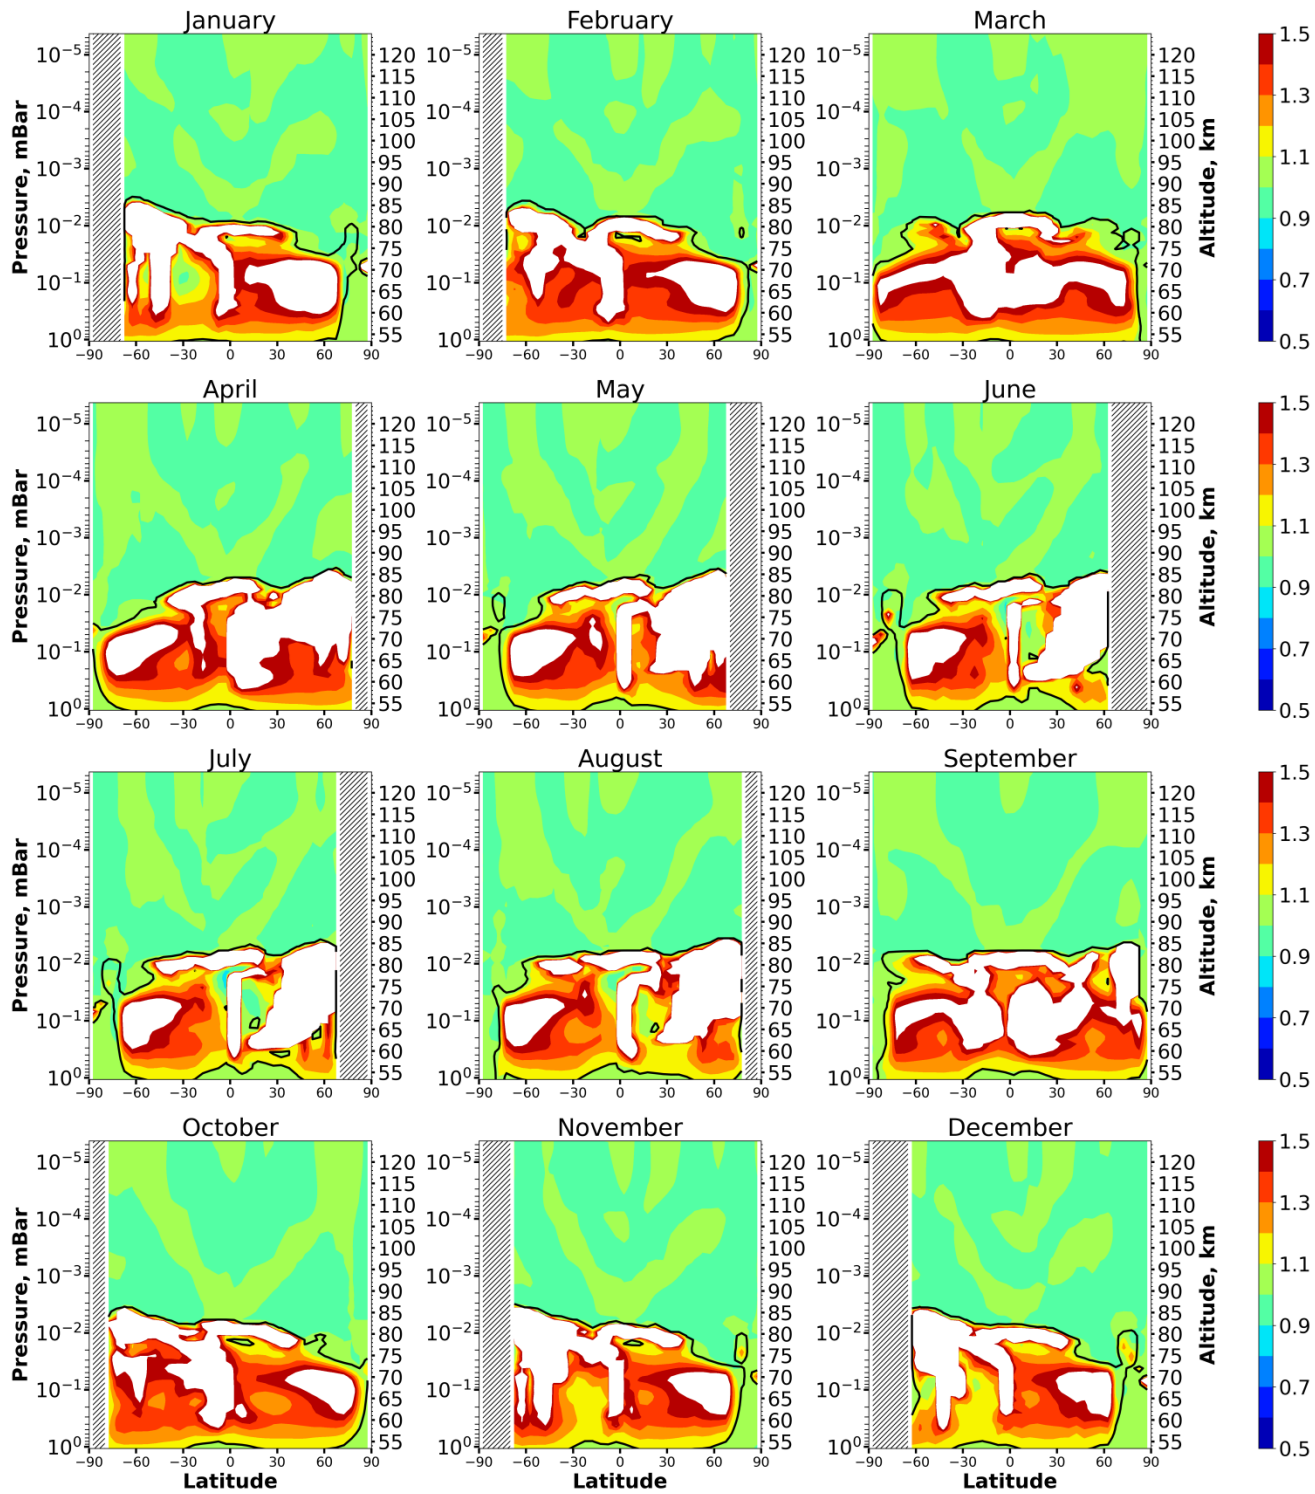

Figure S1. Figure 1 from the paper but with the threshold for the nighttime solar zenith angle is changed to  $95^\circ$ .

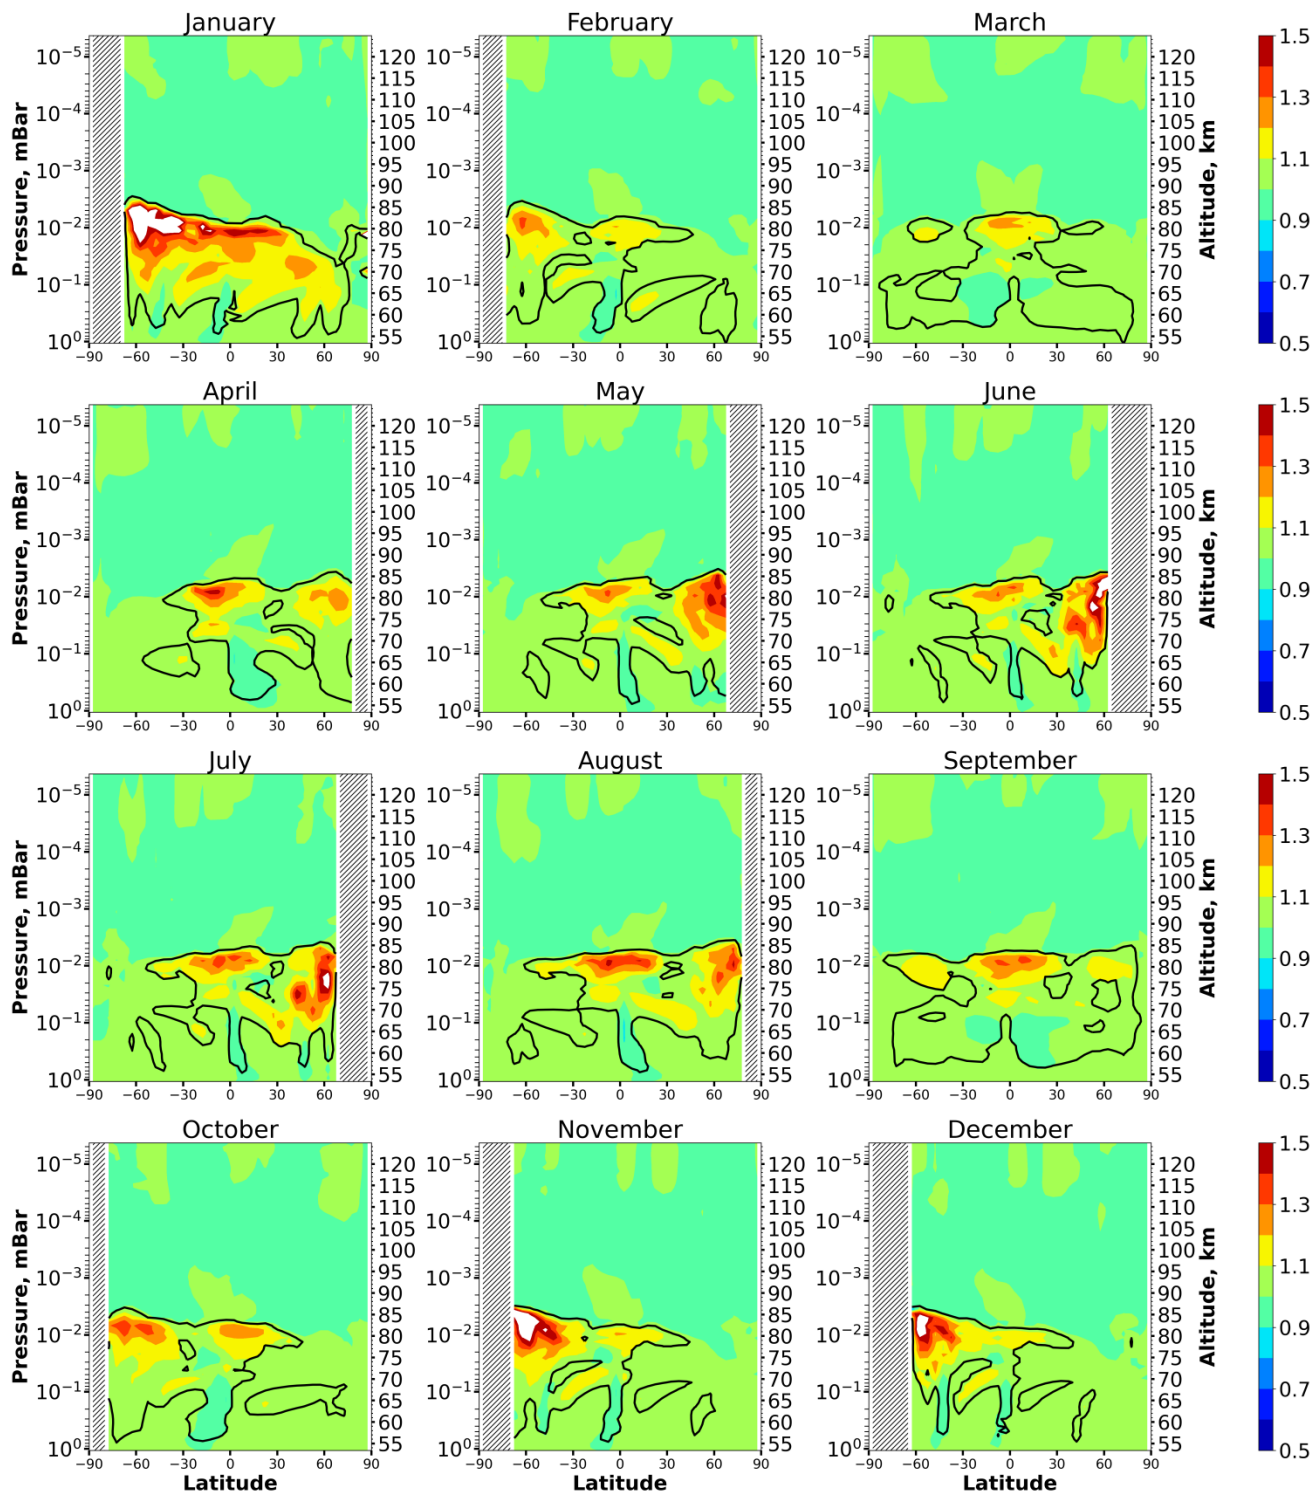

Figure S2. Figure 2 from the paper but with the threshold for the nighttime solar zenith angle is changed to  $95^\circ$ .

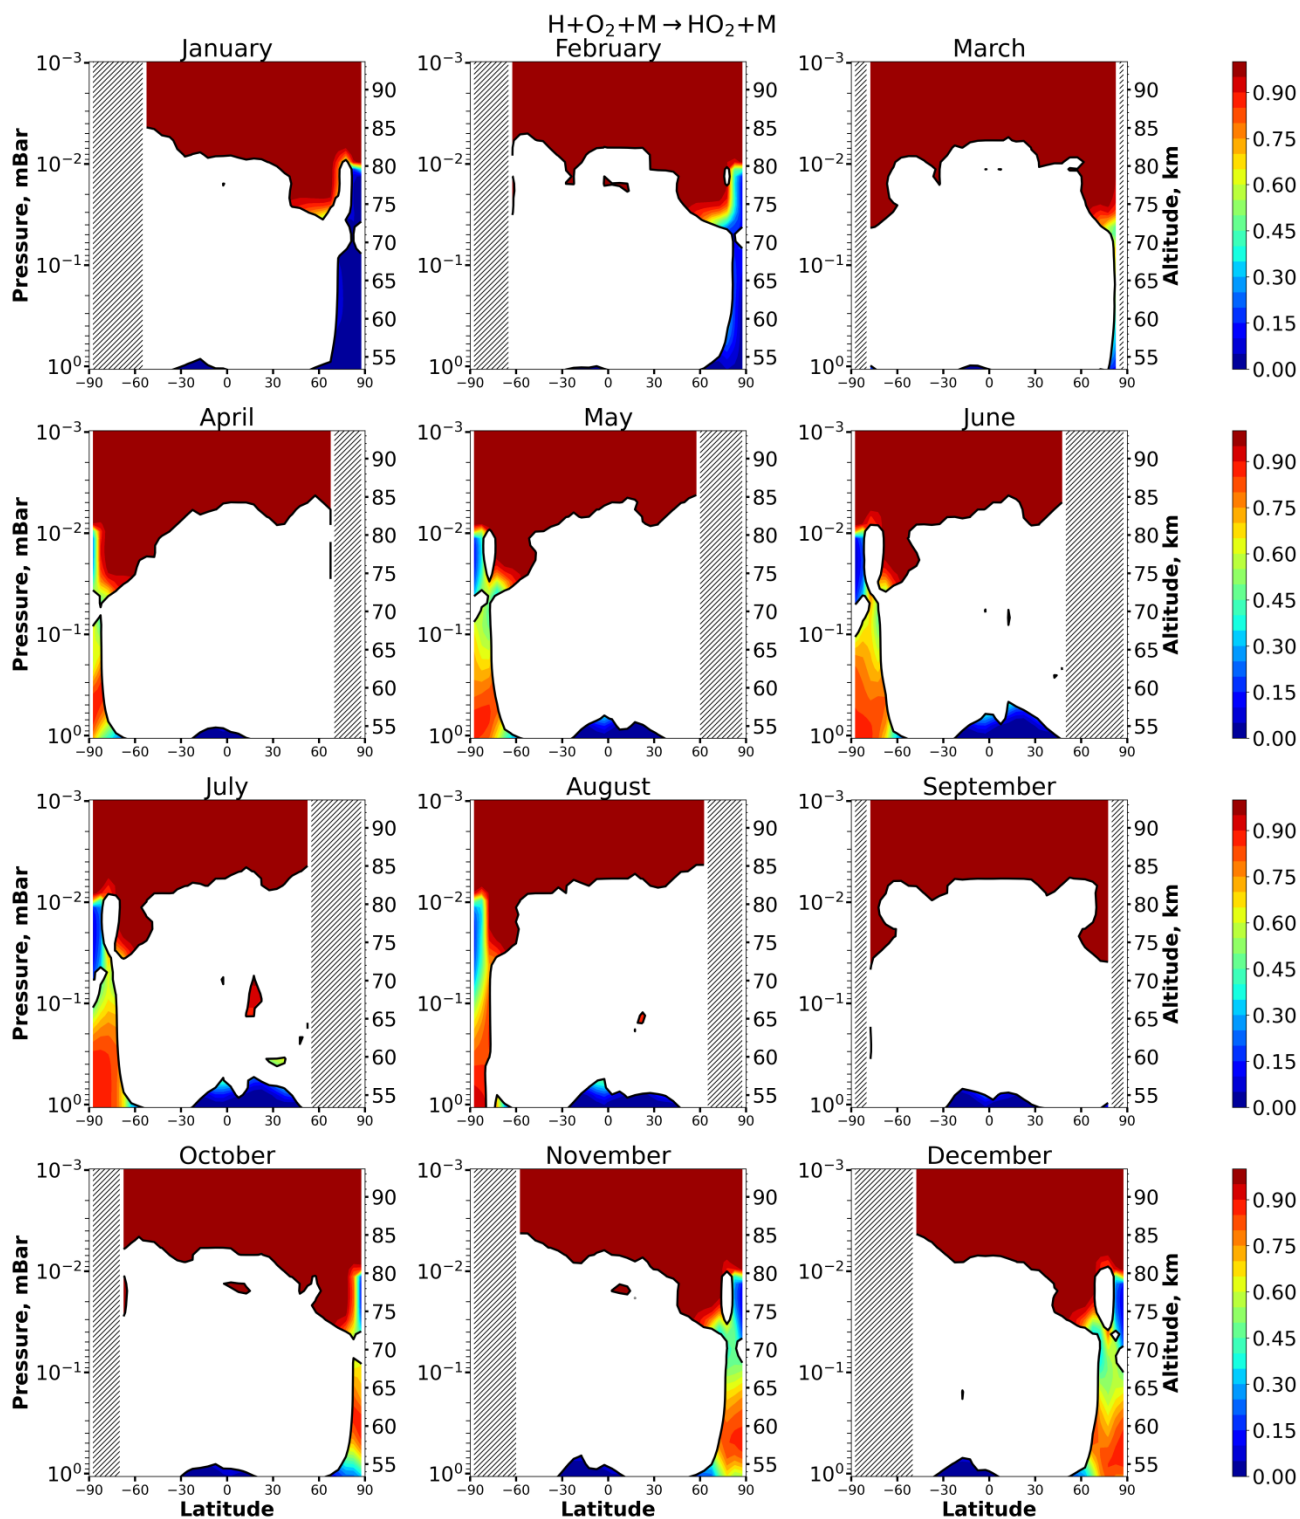

Figure S3. Nighttime mean and monthly averaged relative contribution of the reaction  $\text{H} + \text{O}_2 + \text{M} \rightarrow \text{HO}_2 + \text{M}$  to the total source of  $\text{HO}_2$  in equilibrium areas. White color indicates nonequilibrium areas of  $\text{HO}_2$ .

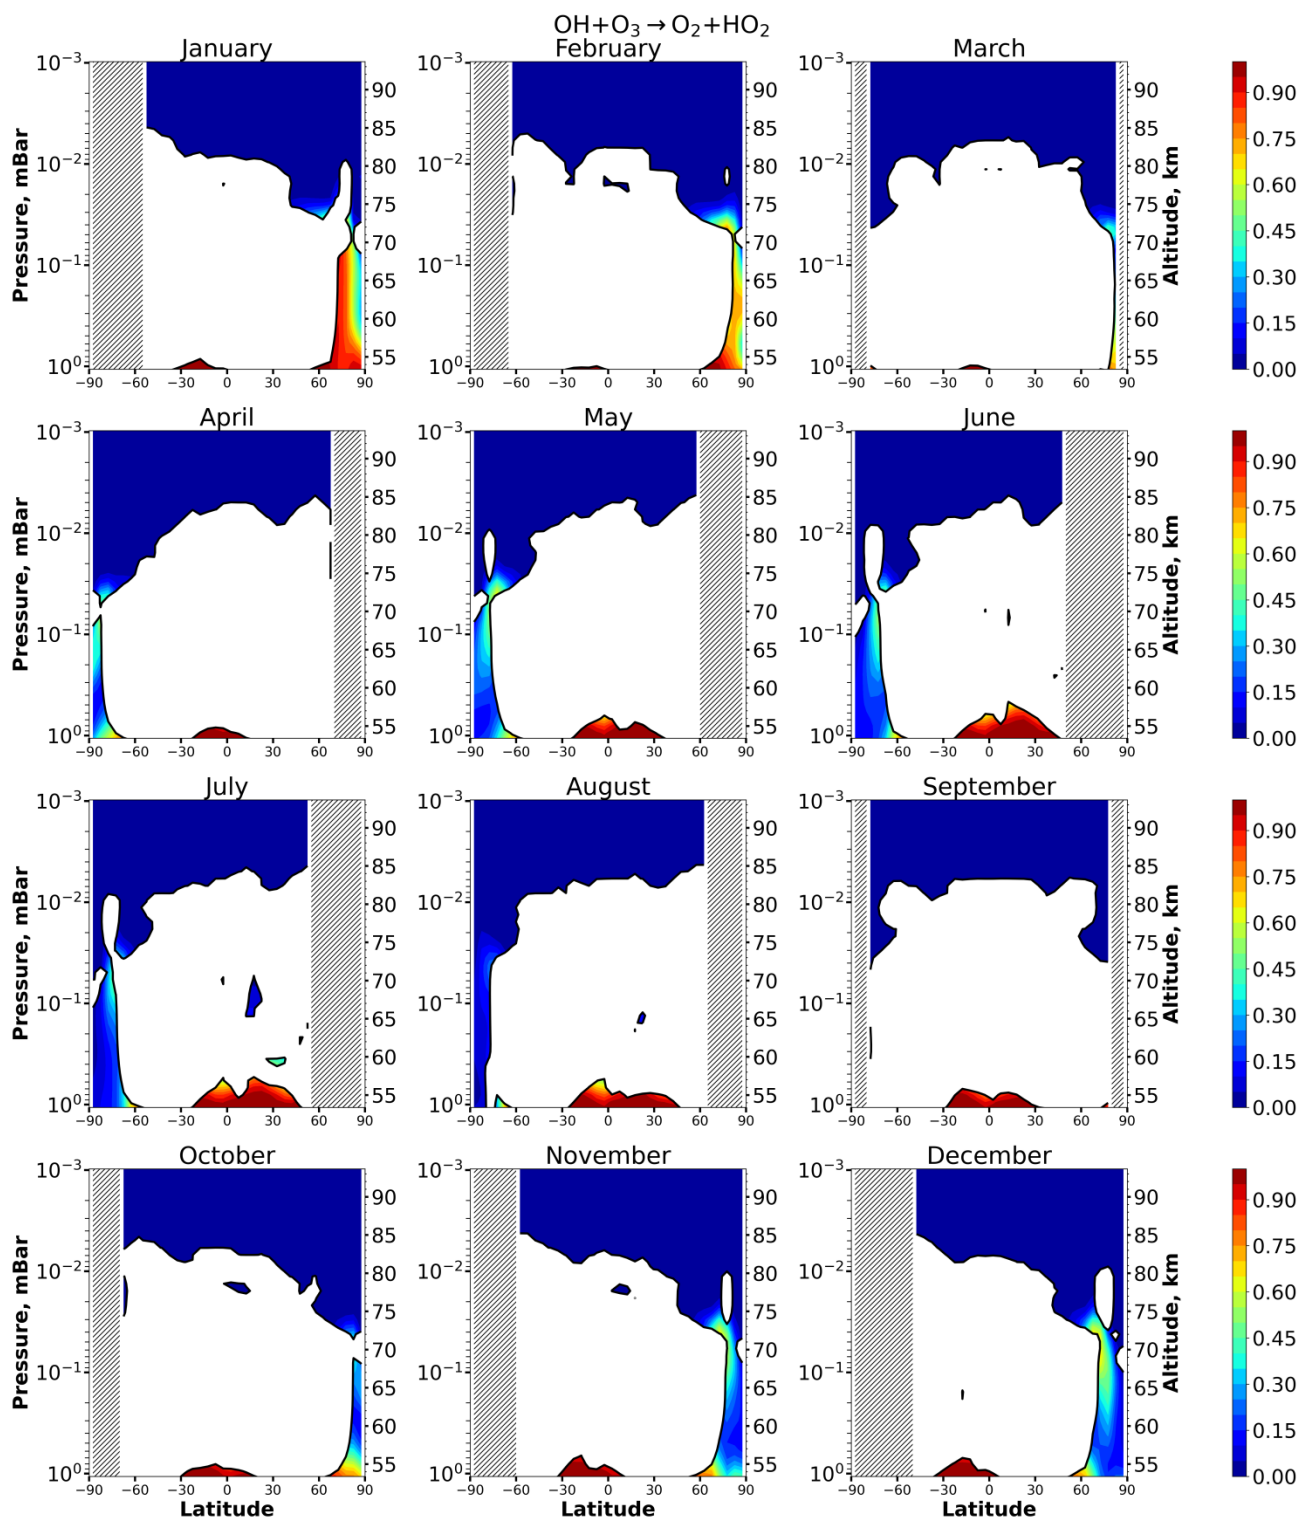

Figure S4. Nighttime mean and monthly averaged relative contribution of the reaction  $\text{OH} + \text{O}_3 \rightarrow \text{O}_2 + \text{HO}_2$  to the total source of  $\text{HO}_2$  in equilibrium areas. White color indicates nonequilibrium areas of  $\text{HO}_2$ .

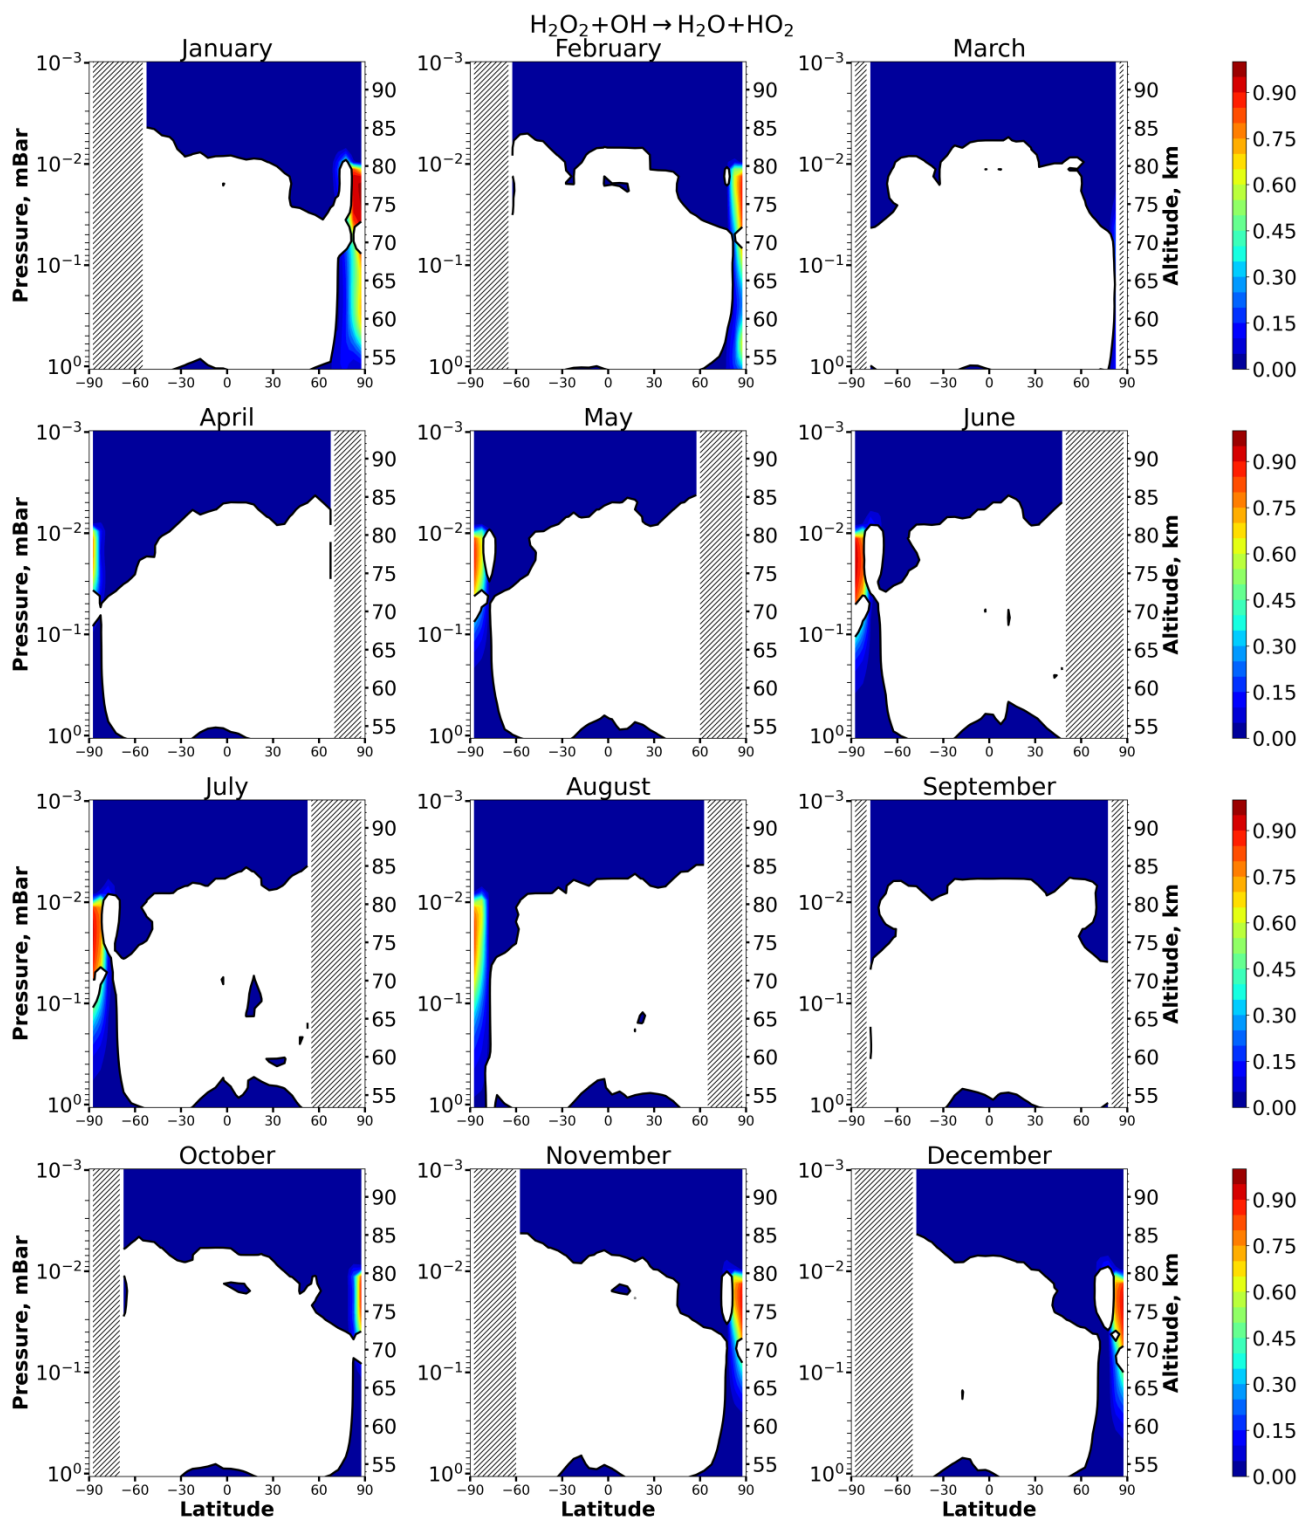

Figure S5. Nighttime mean and monthly averaged relative contribution of the reaction  $\text{H}_2\text{O}_2 + \text{OH} \rightarrow \text{H}_2\text{O} + \text{HO}_2$  to the total source of  $\text{HO}_2$  in equilibrium areas. White color indicates nonequilibrium areas of  $\text{HO}_2$ .

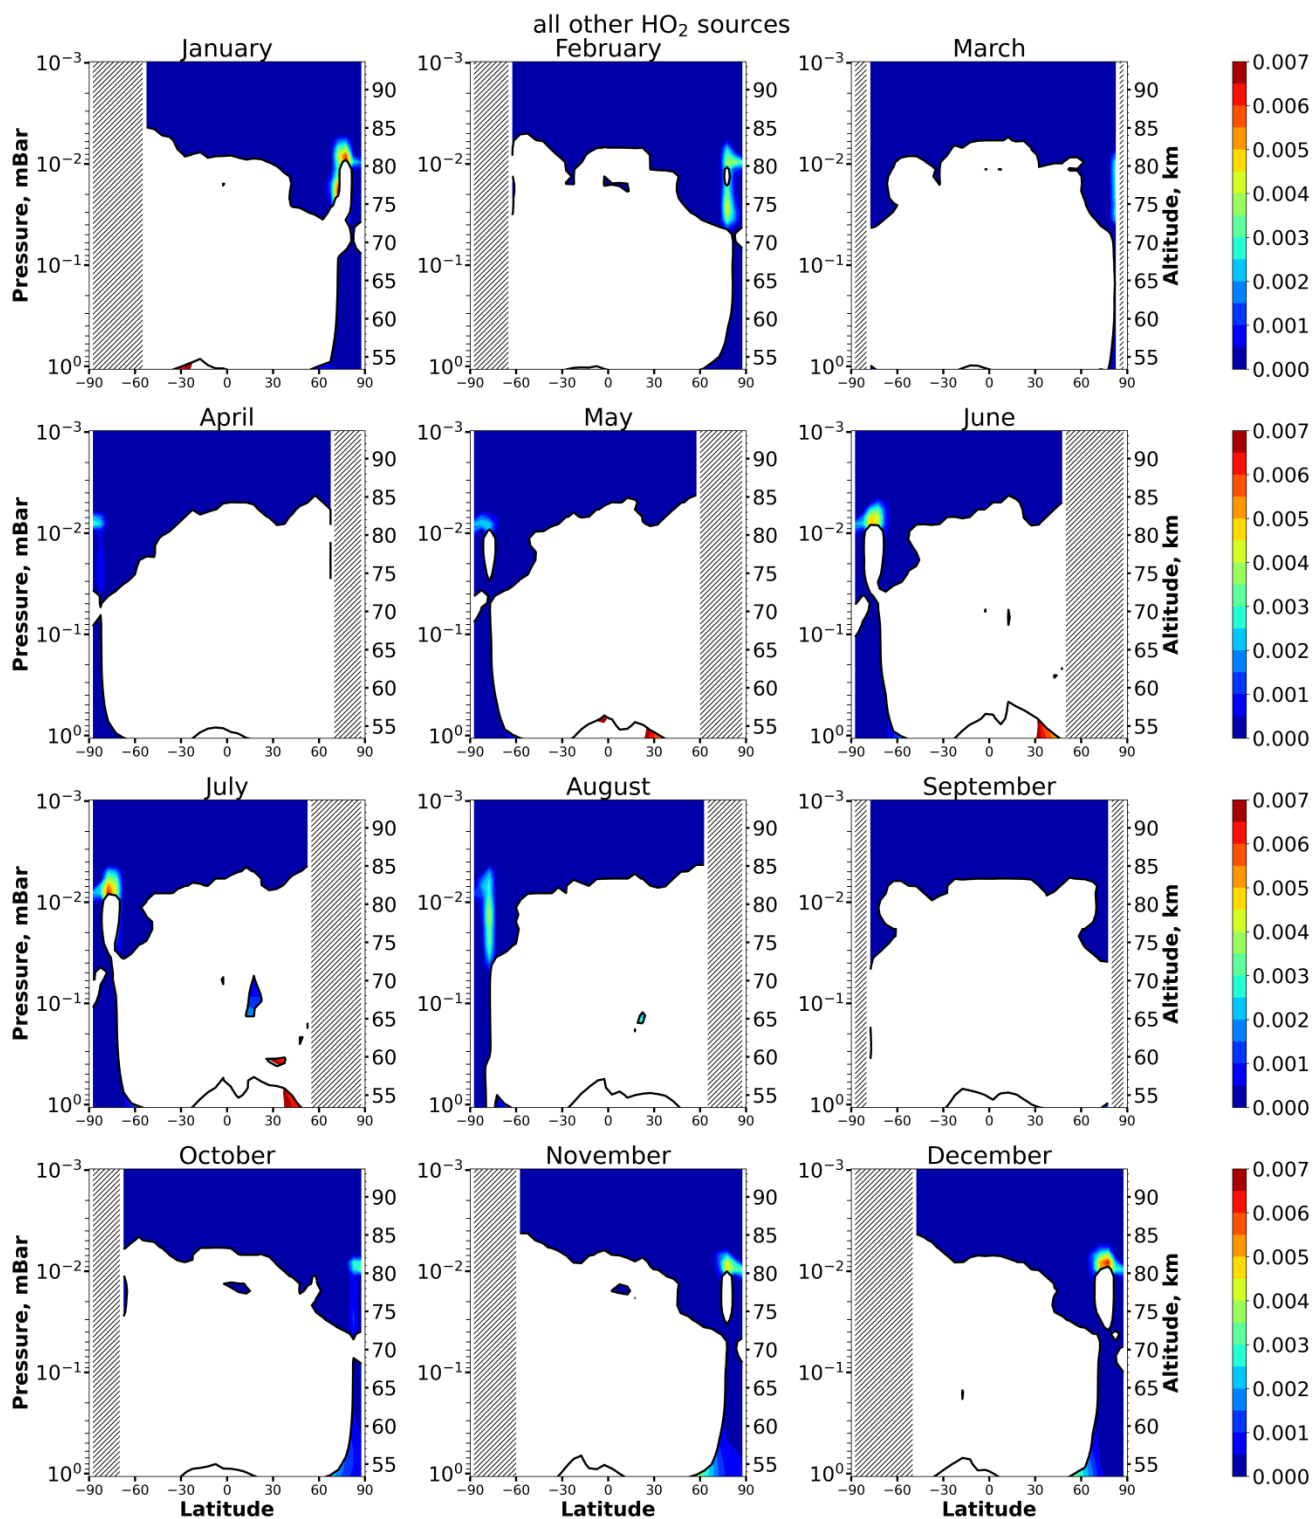

Figure S6. Nighttime mean and monthly averaged relative total contribution of all other reactions (H<sub>2</sub>O<sub>2</sub>+O → OH+HO<sub>2</sub>, CHO+O<sub>2</sub> → HO<sub>2</sub>+CO, and CH<sub>3</sub>O+O<sub>2</sub> → CH<sub>2</sub>O+HO<sub>2</sub>) to the total source of HO<sub>2</sub> in equilibrium areas. White color indicates nonequilibrium areas of HO<sub>2</sub>.

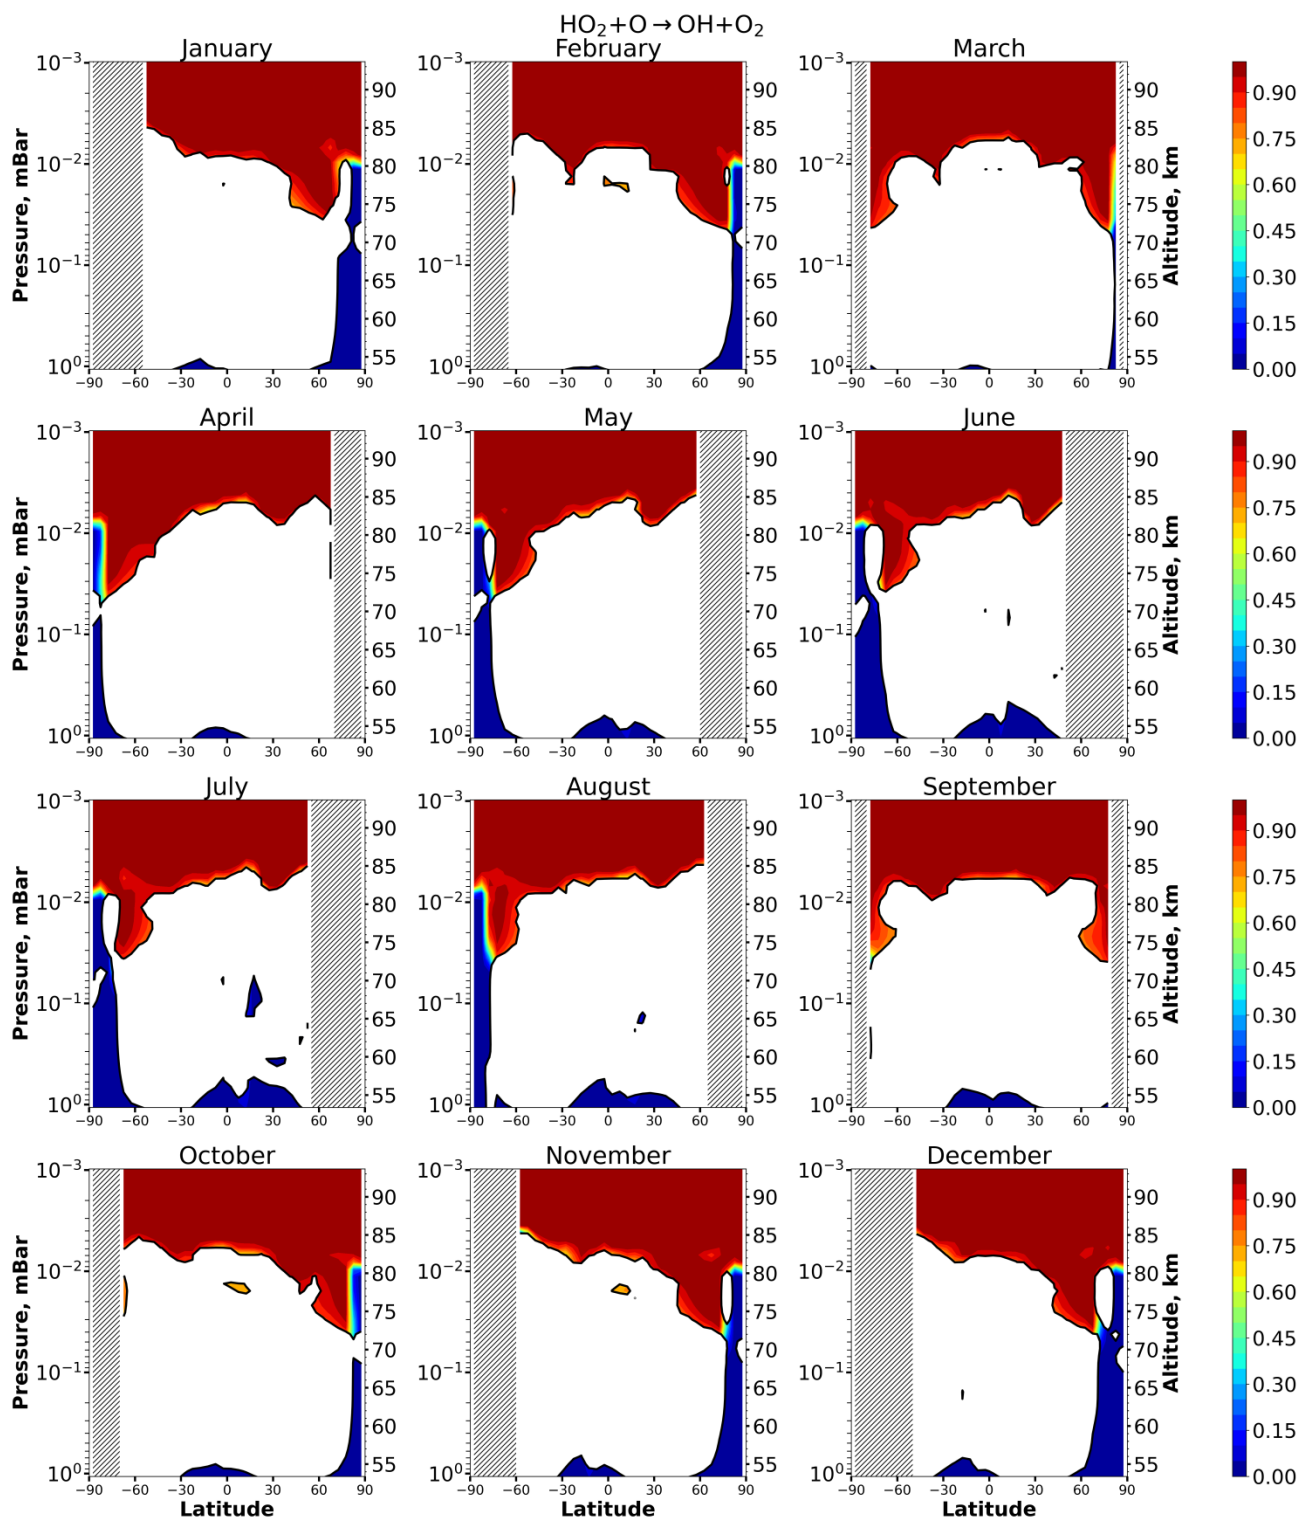

Figure S7. Nighttime mean and monthly averaged relative contribution of the reaction  $\text{HO}_2 + \text{O} \rightarrow \text{OH} + \text{O}_2$  to the total sink of  $\text{HO}_2$  in equilibrium areas. White color indicates nonequilibrium areas of  $\text{HO}_2$ .

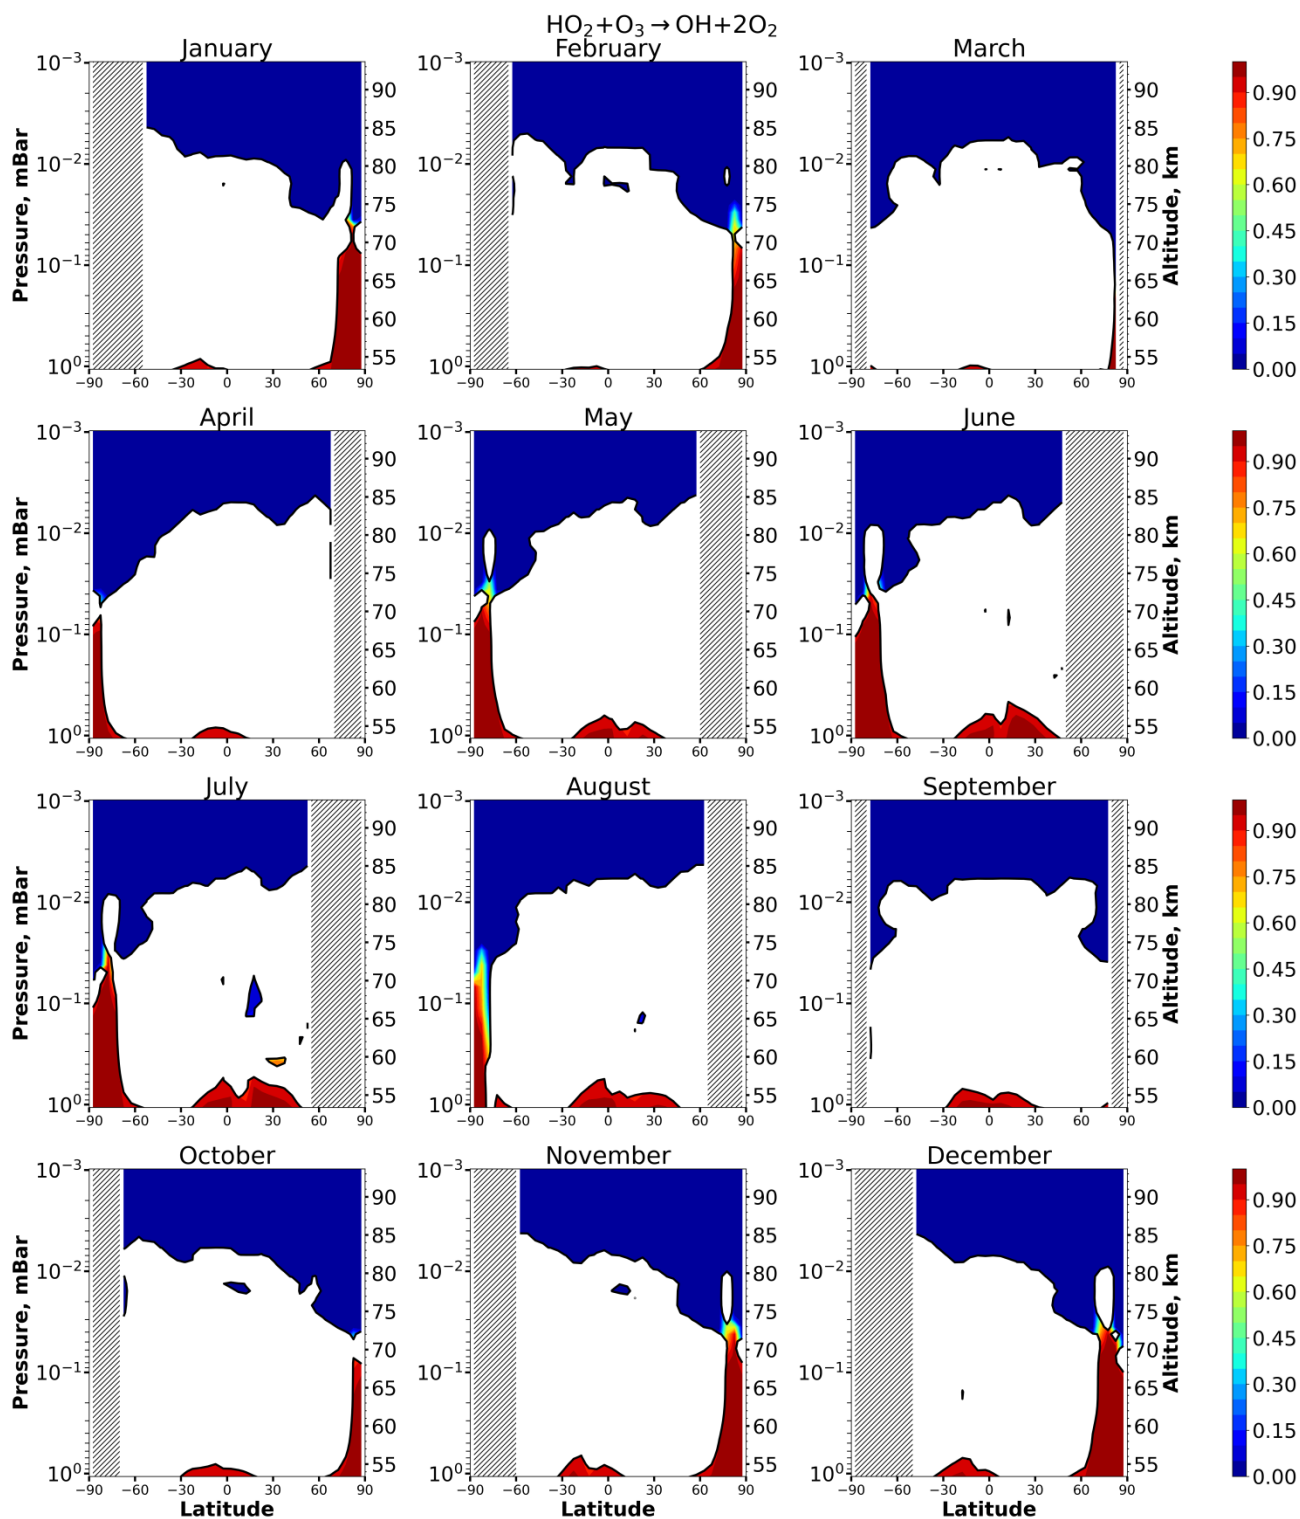

Figure S8. Nighttime mean and monthly averaged relative contribution of the reaction  $\text{HO}_2 + \text{O}_3 \rightarrow \text{OH} + 2\text{O}_2$  to the total sink of  $\text{HO}_2$  in equilibrium areas. White color indicates nonequilibrium areas of  $\text{HO}_2$ .

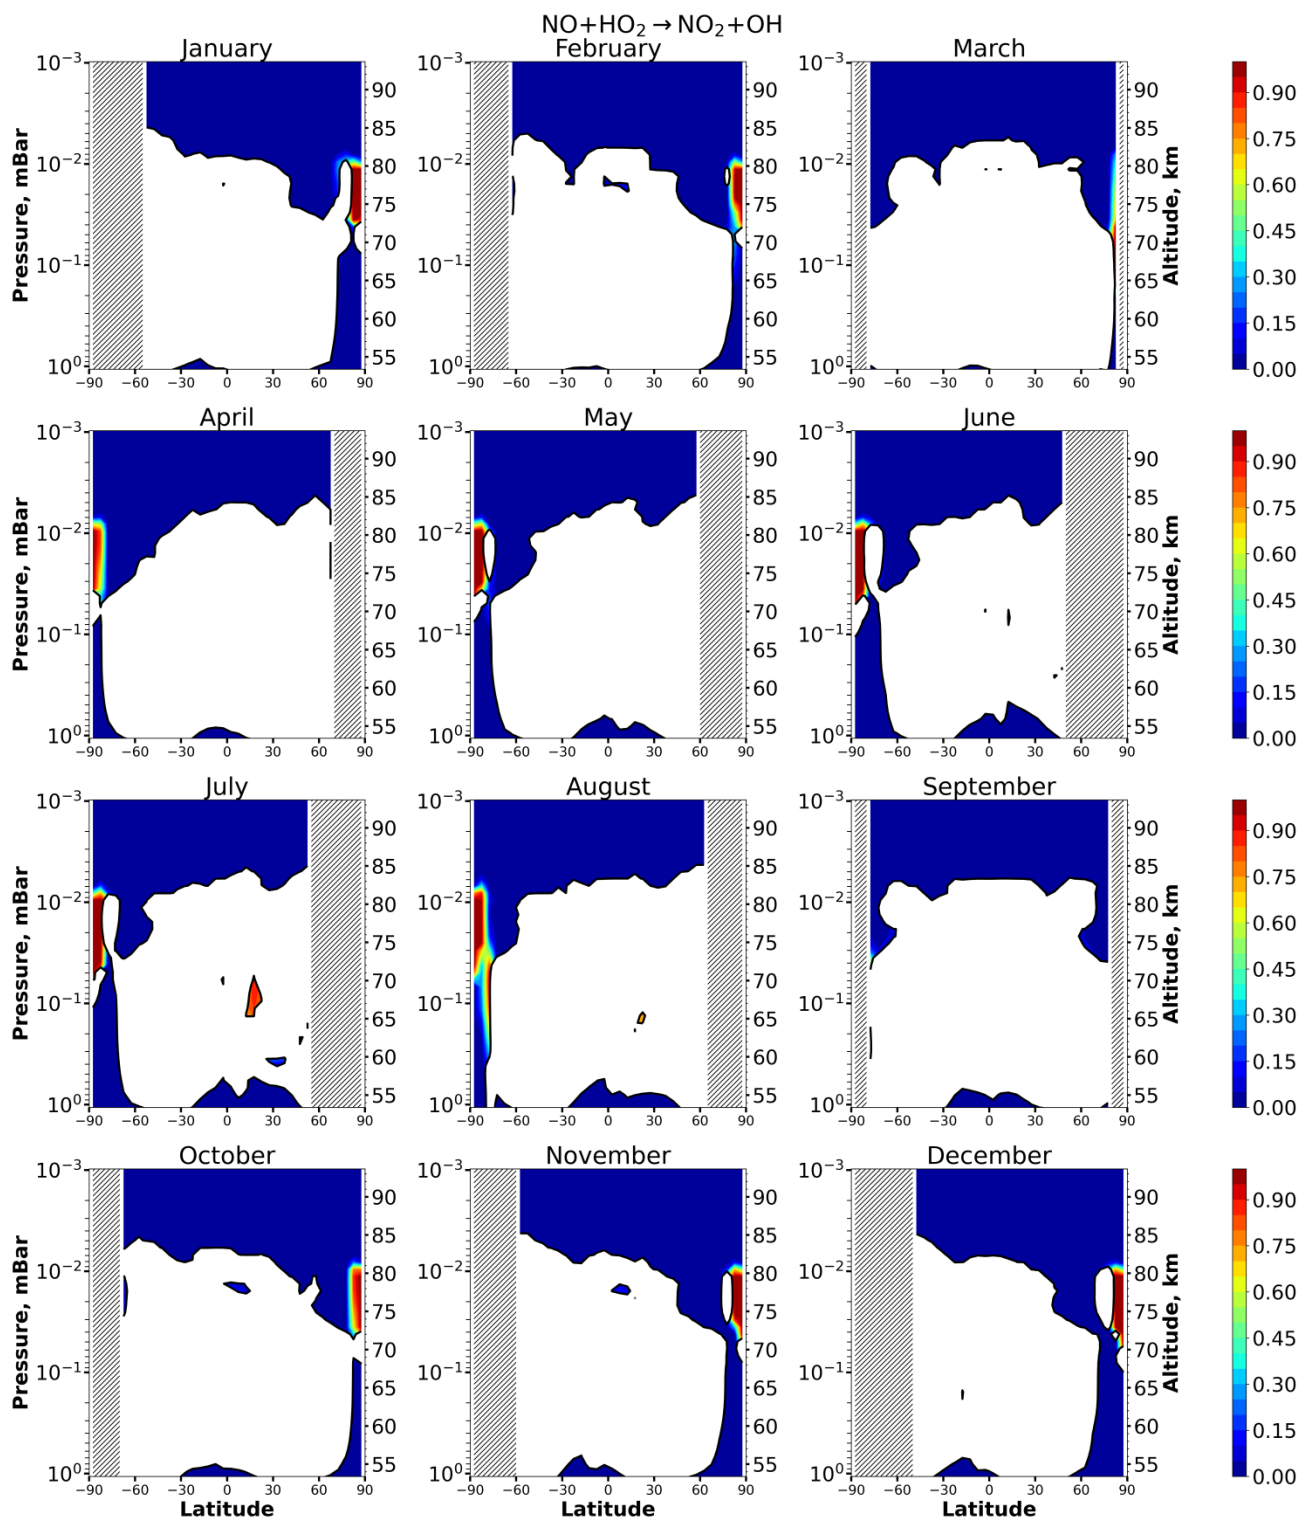

Figure S9. Nighttime mean and monthly averaged relative contribution of the reaction  $\text{NO} + \text{HO}_2 \rightarrow \text{NO}_2 + \text{OH}$  to the total sink of  $\text{HO}_2$  in equilibrium areas. White color indicates nonequilibrium areas of  $\text{HO}_2$ .

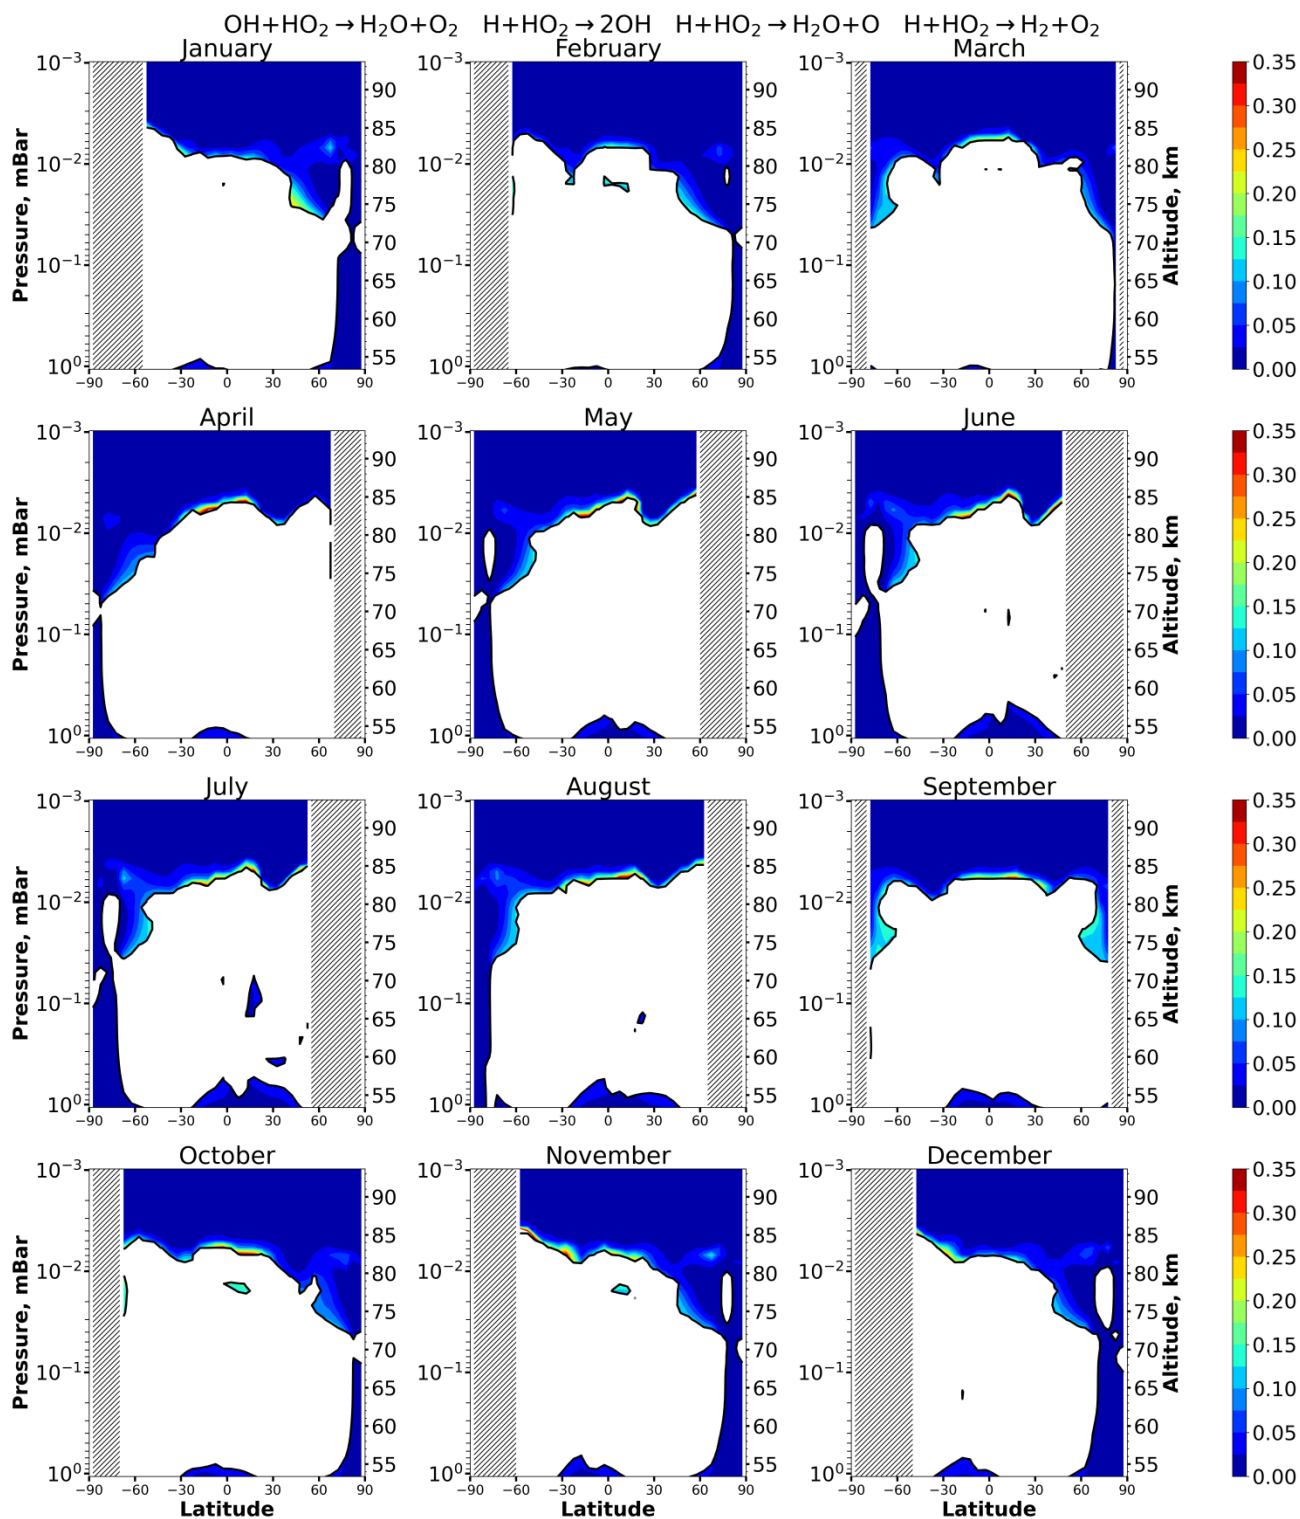

Figure S10. Nighttime mean and monthly averaged relative total contribution of the reactions  $\text{OH} + \text{HO}_2 \rightarrow \text{H}_2\text{O} + \text{O}_2$ ,  $\text{H} + \text{HO}_2 \rightarrow 2\text{OH}$ ,  $\text{H} + \text{HO}_2 \rightarrow \text{H}_2\text{O} + \text{O}$ , and  $\text{H} + \text{HO}_2 \rightarrow \text{H}_2 + \text{O}_2$  to the total sink of  $\text{HO}_2$  in equilibrium areas. White color indicates nonequilibrium areas of  $\text{HO}_2$ .

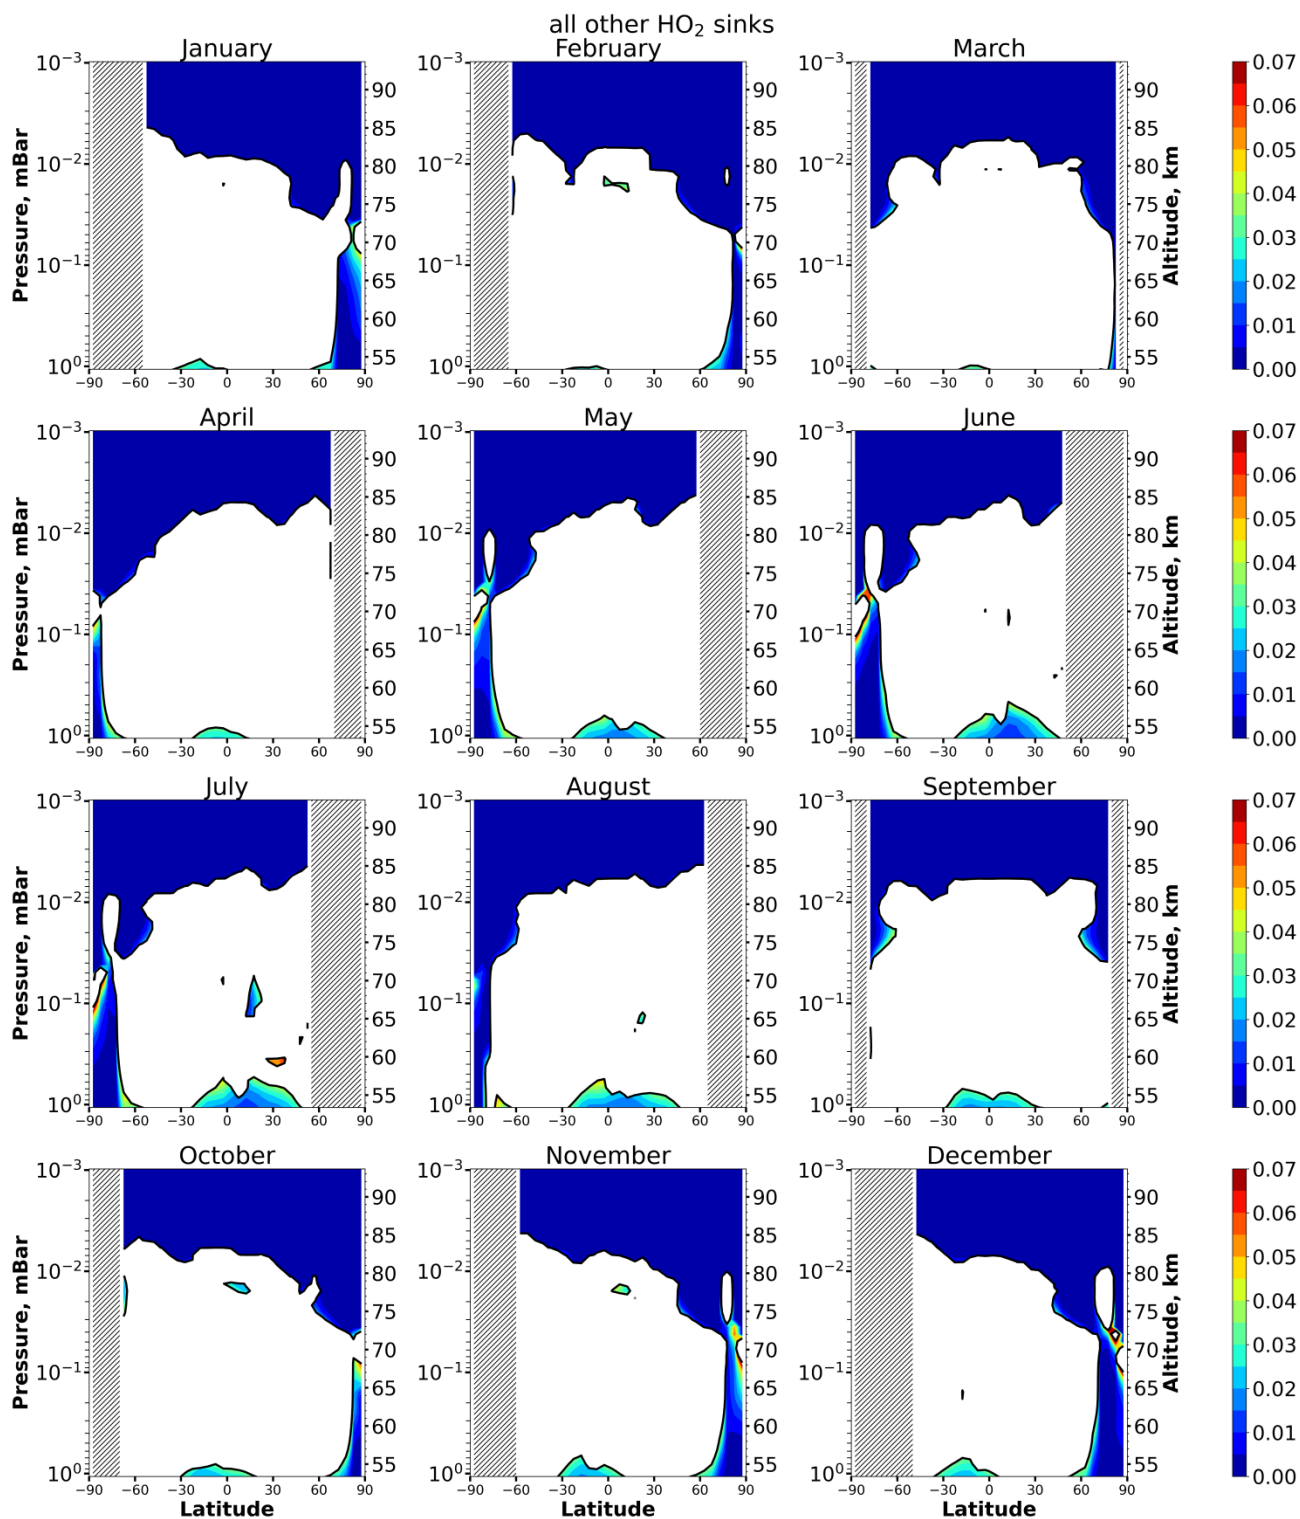

Figure S11. Nighttime mean and monthly averaged relative contribution of total contribution of all other reactions (HO<sub>2</sub>+HO<sub>2</sub> → H<sub>2</sub>O<sub>2</sub>+O<sub>2</sub> and HO<sub>2</sub>+HO<sub>2</sub>+M → H<sub>2</sub>O<sub>2</sub>+O<sub>2</sub>+M) to the total sink of HO<sub>2</sub> in equilibrium areas. White color indicates nonequilibrium areas of HO<sub>2</sub>.

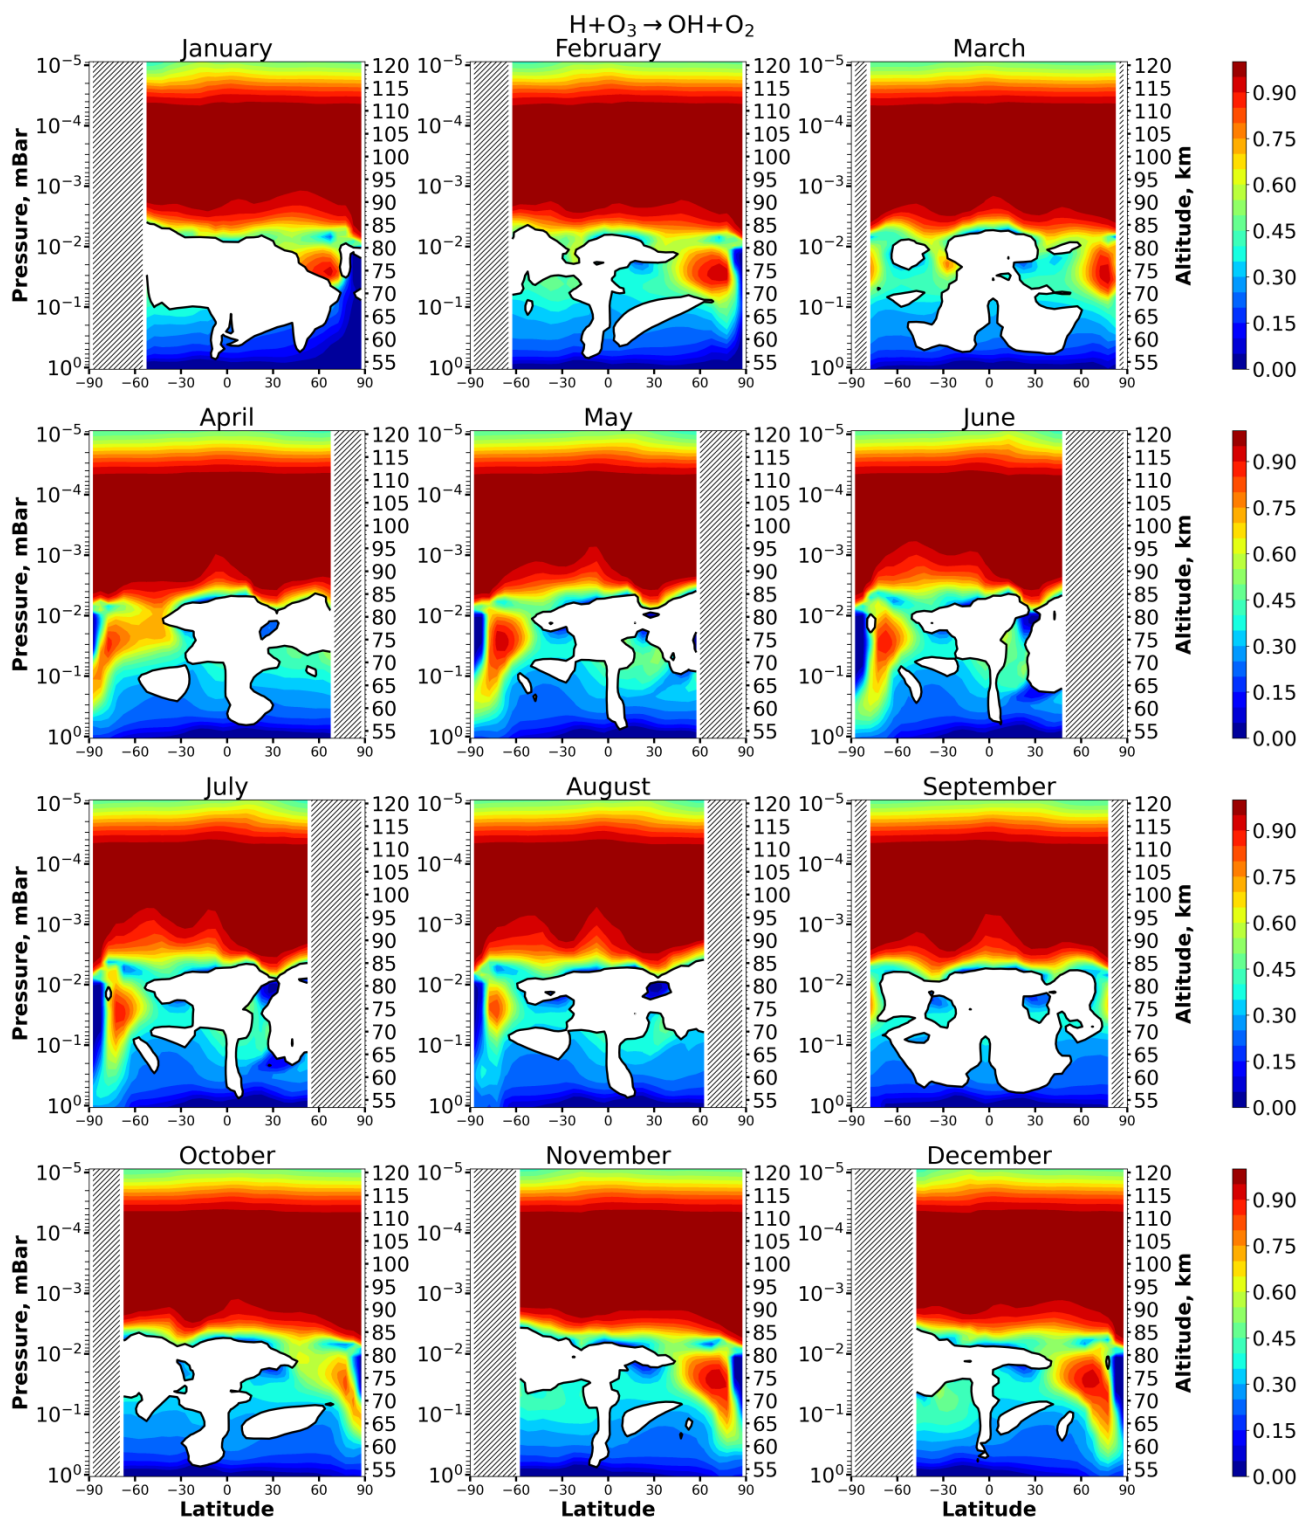

Figure S12. Nighttime mean and monthly averaged relative contribution of the reaction  $\text{H} + \text{O}_3 \rightarrow \text{OH} + \text{O}_2$  to the total source of OH in equilibrium areas. White color indicates nonequilibrium areas of OH.

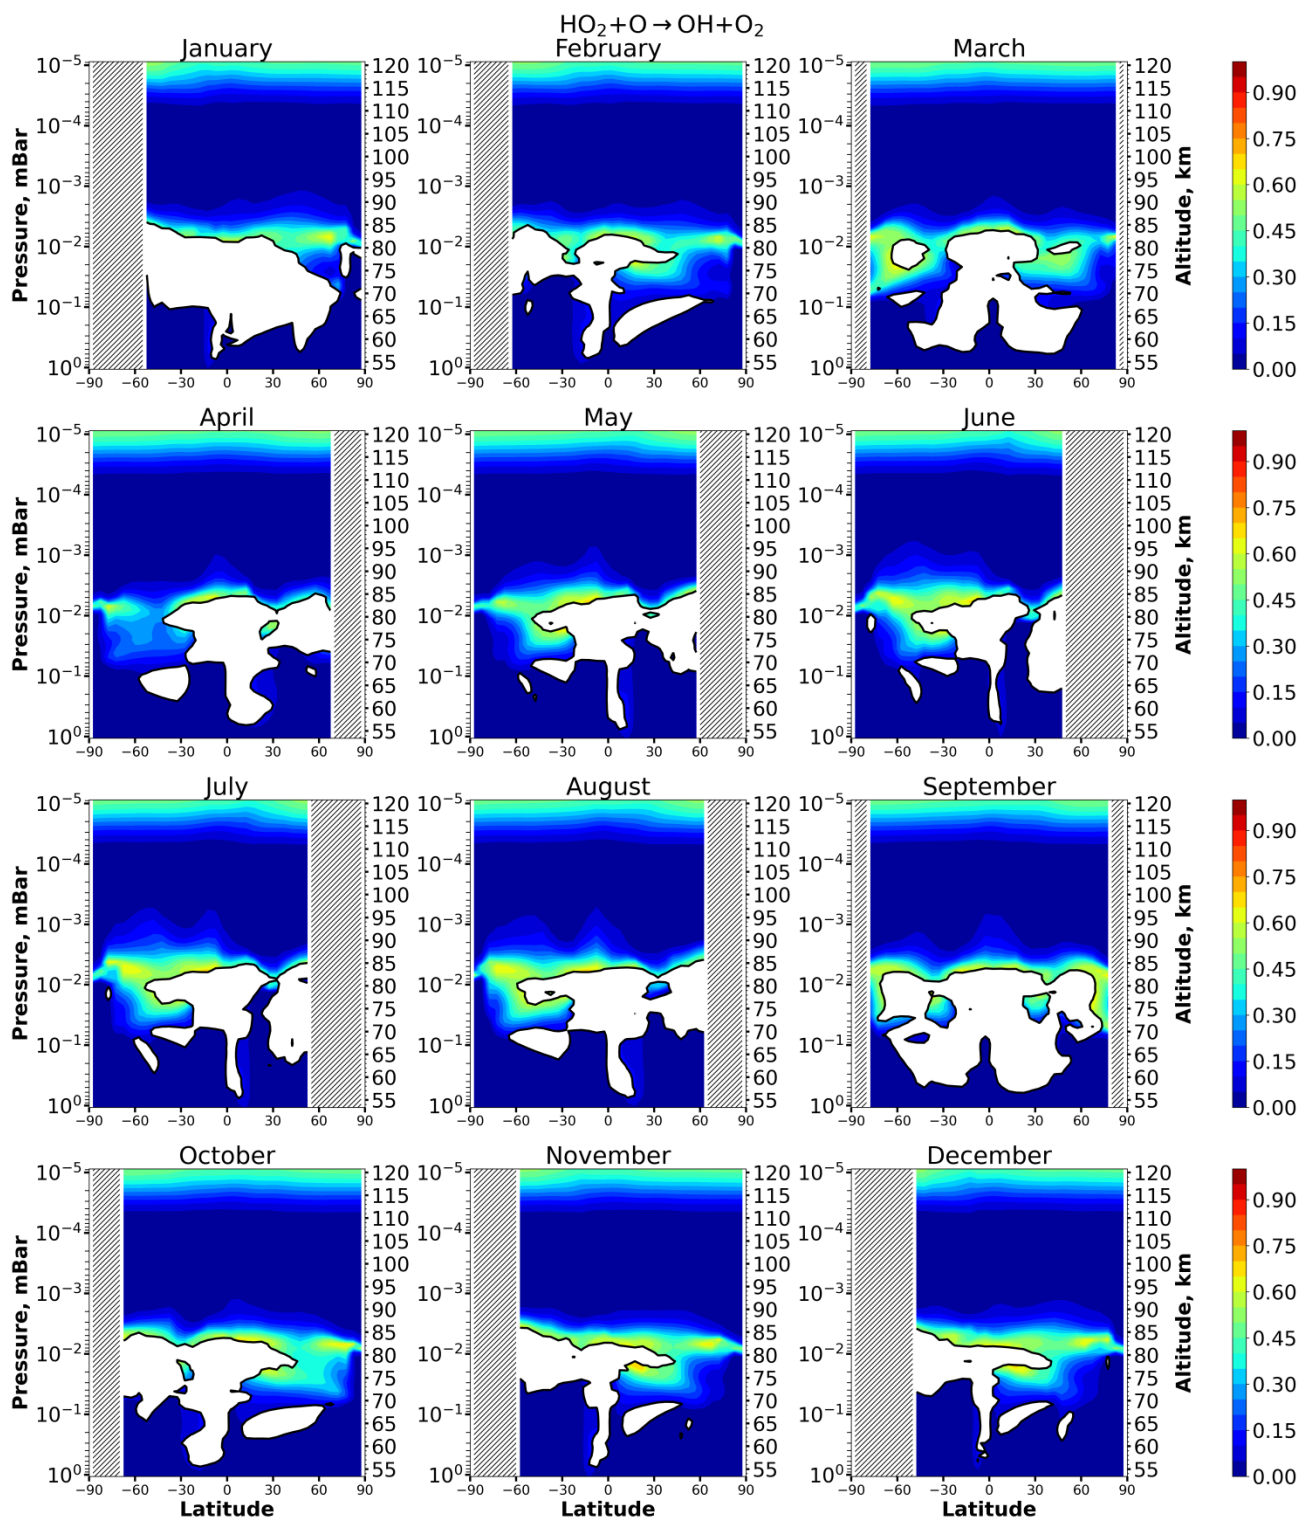

Figure S13. Nighttime mean and monthly averaged relative contribution of the reaction  $\text{HO}_2 + \text{O} \rightarrow \text{OH} + \text{O}_2$  to the total source of OH in equilibrium areas. White color indicates nonequilibrium areas of OH.

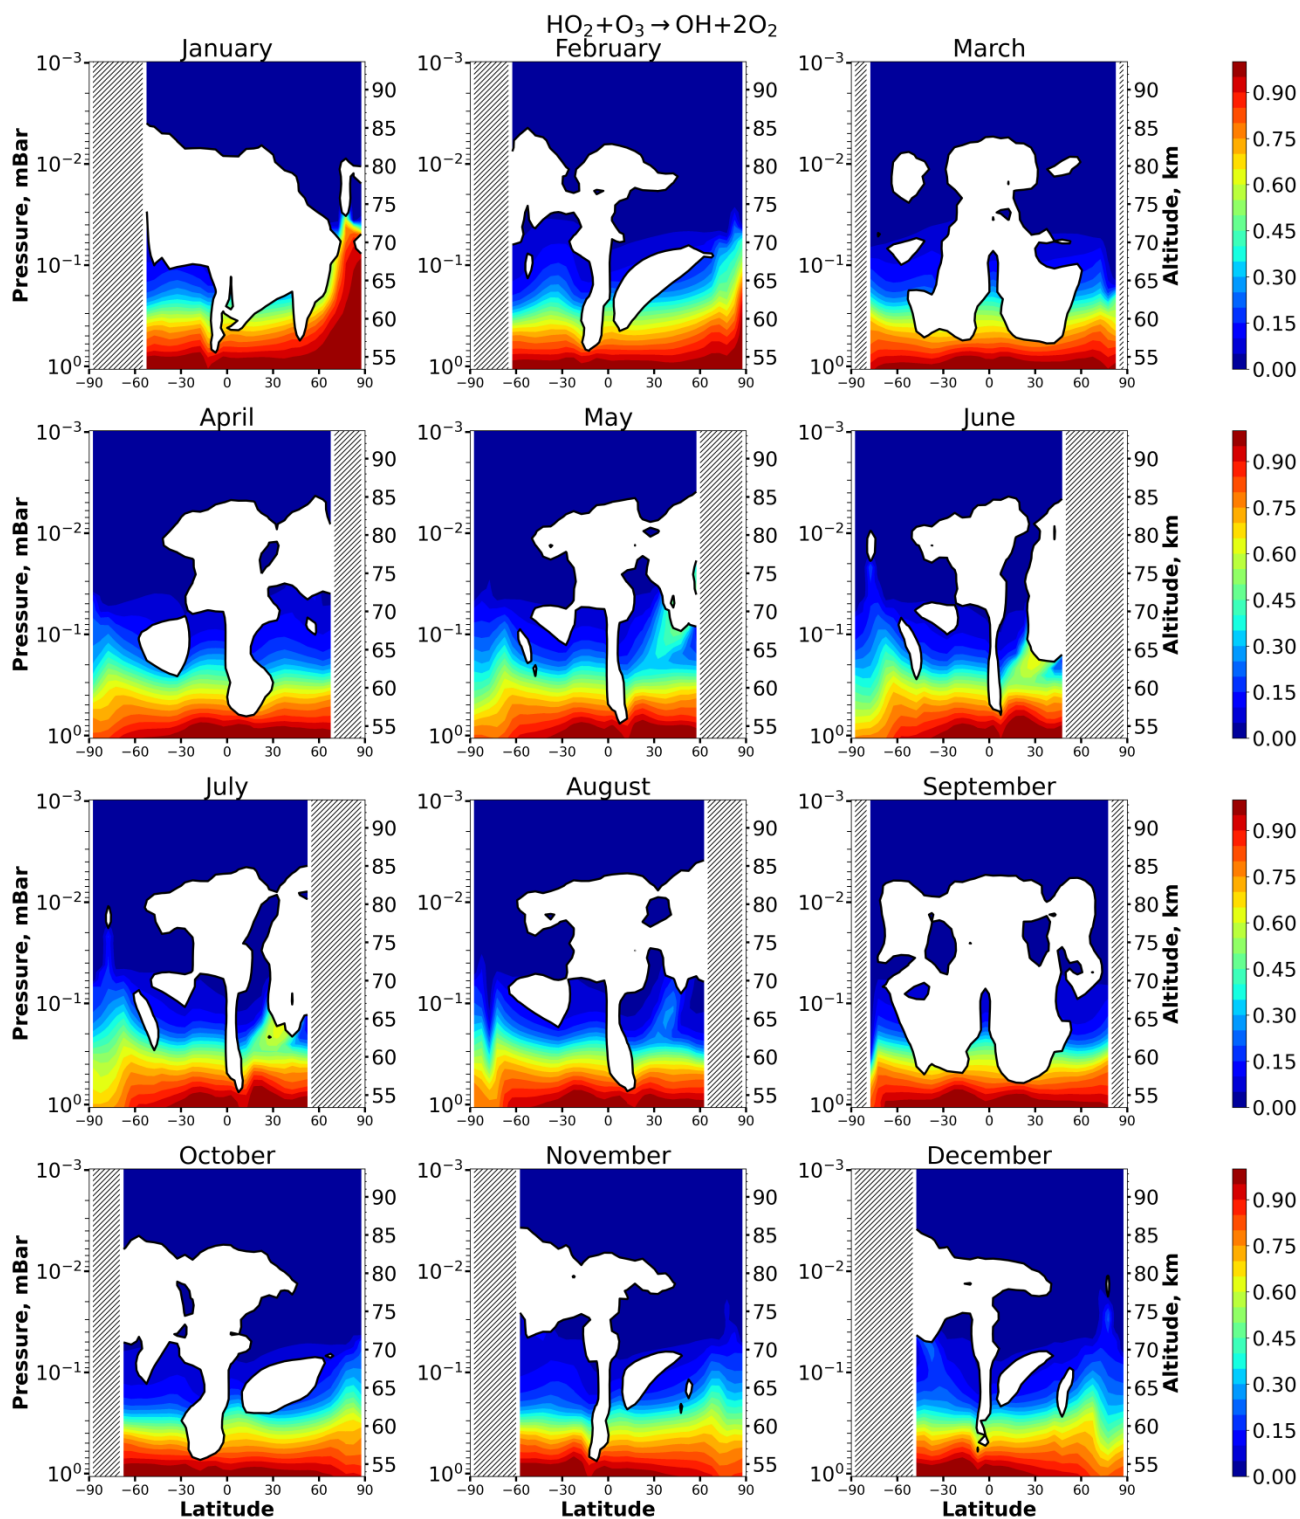

Figure S14. Nighttime mean and monthly averaged relative contribution of the reaction  $\text{HO}_2 + \text{O}_3 \rightarrow \text{OH} + 2\text{O}_2$  to the total source of OH in equilibrium areas. White color indicates nonequilibrium areas of OH.

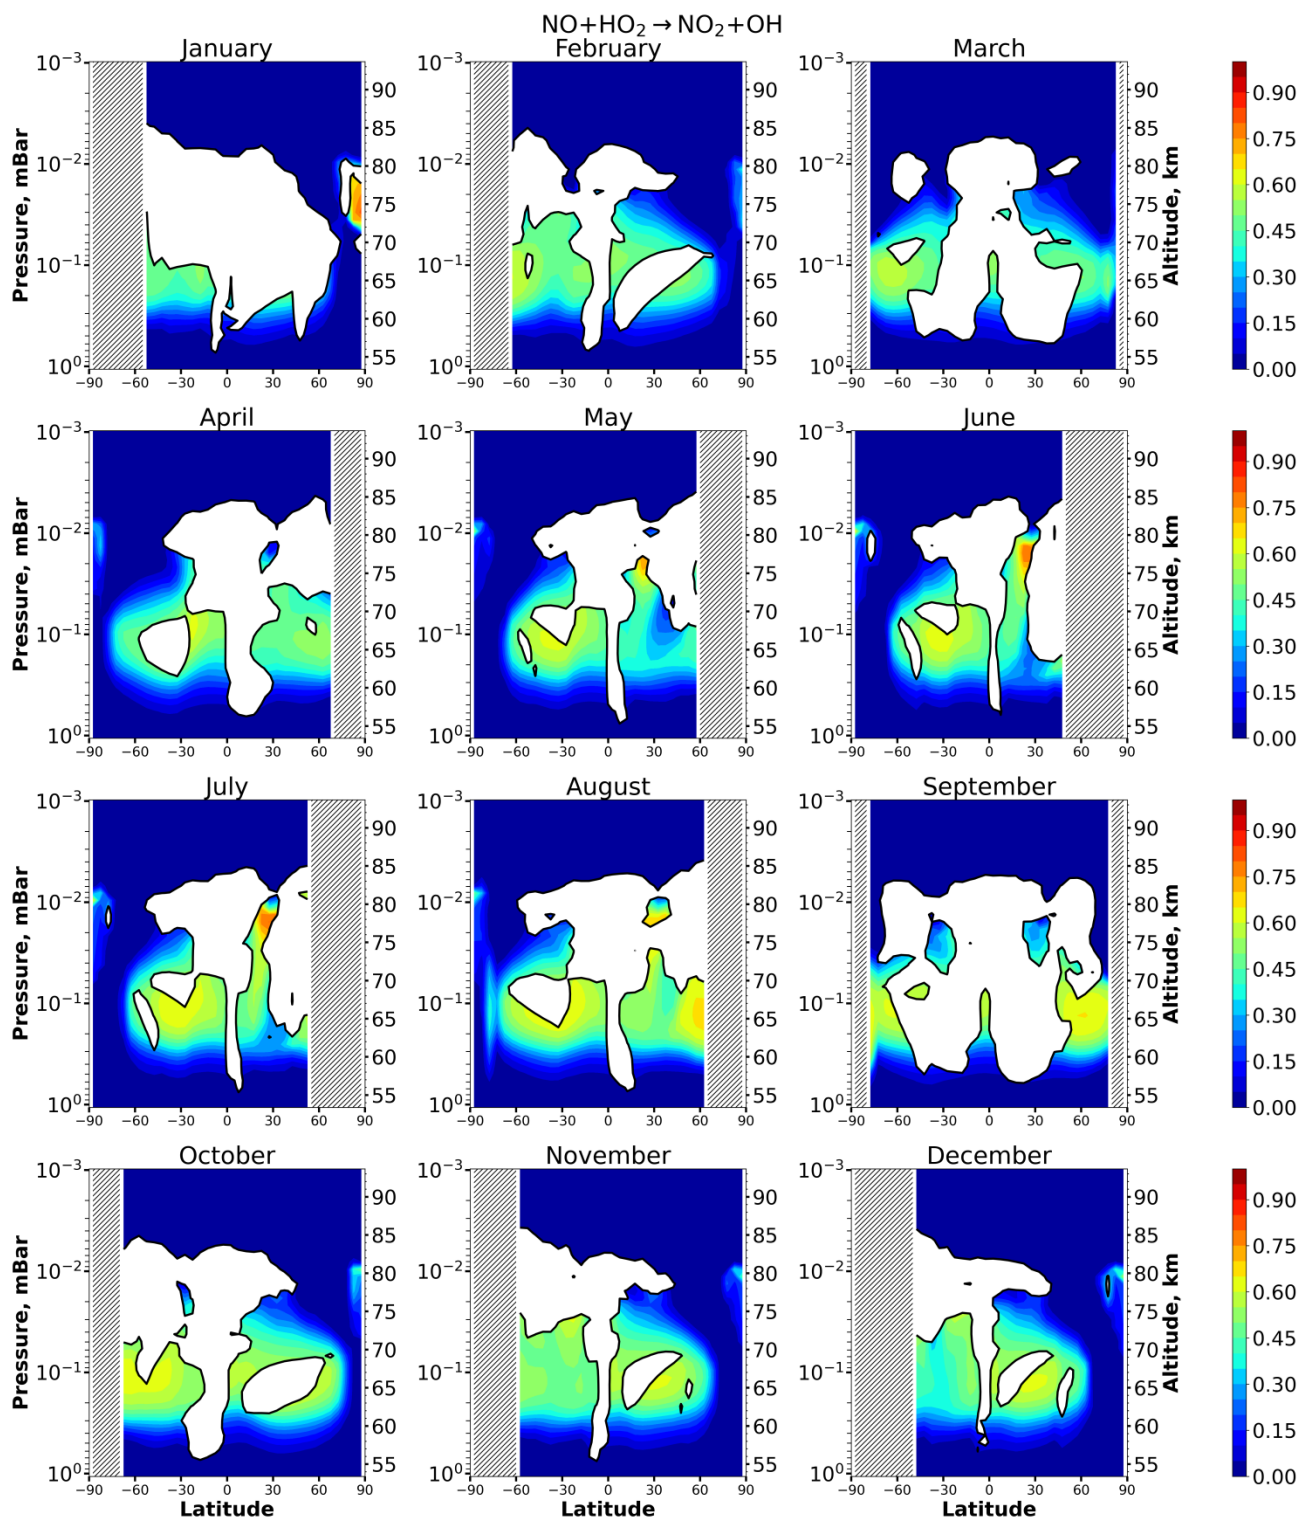

Figure S15. Nighttime mean and monthly averaged relative contribution of the reaction  $\text{NO} + \text{HO}_2 \rightarrow \text{NO}_2 + \text{OH}$  to the total source of OH in equilibrium areas. White color indicates nonequilibrium areas of OH.

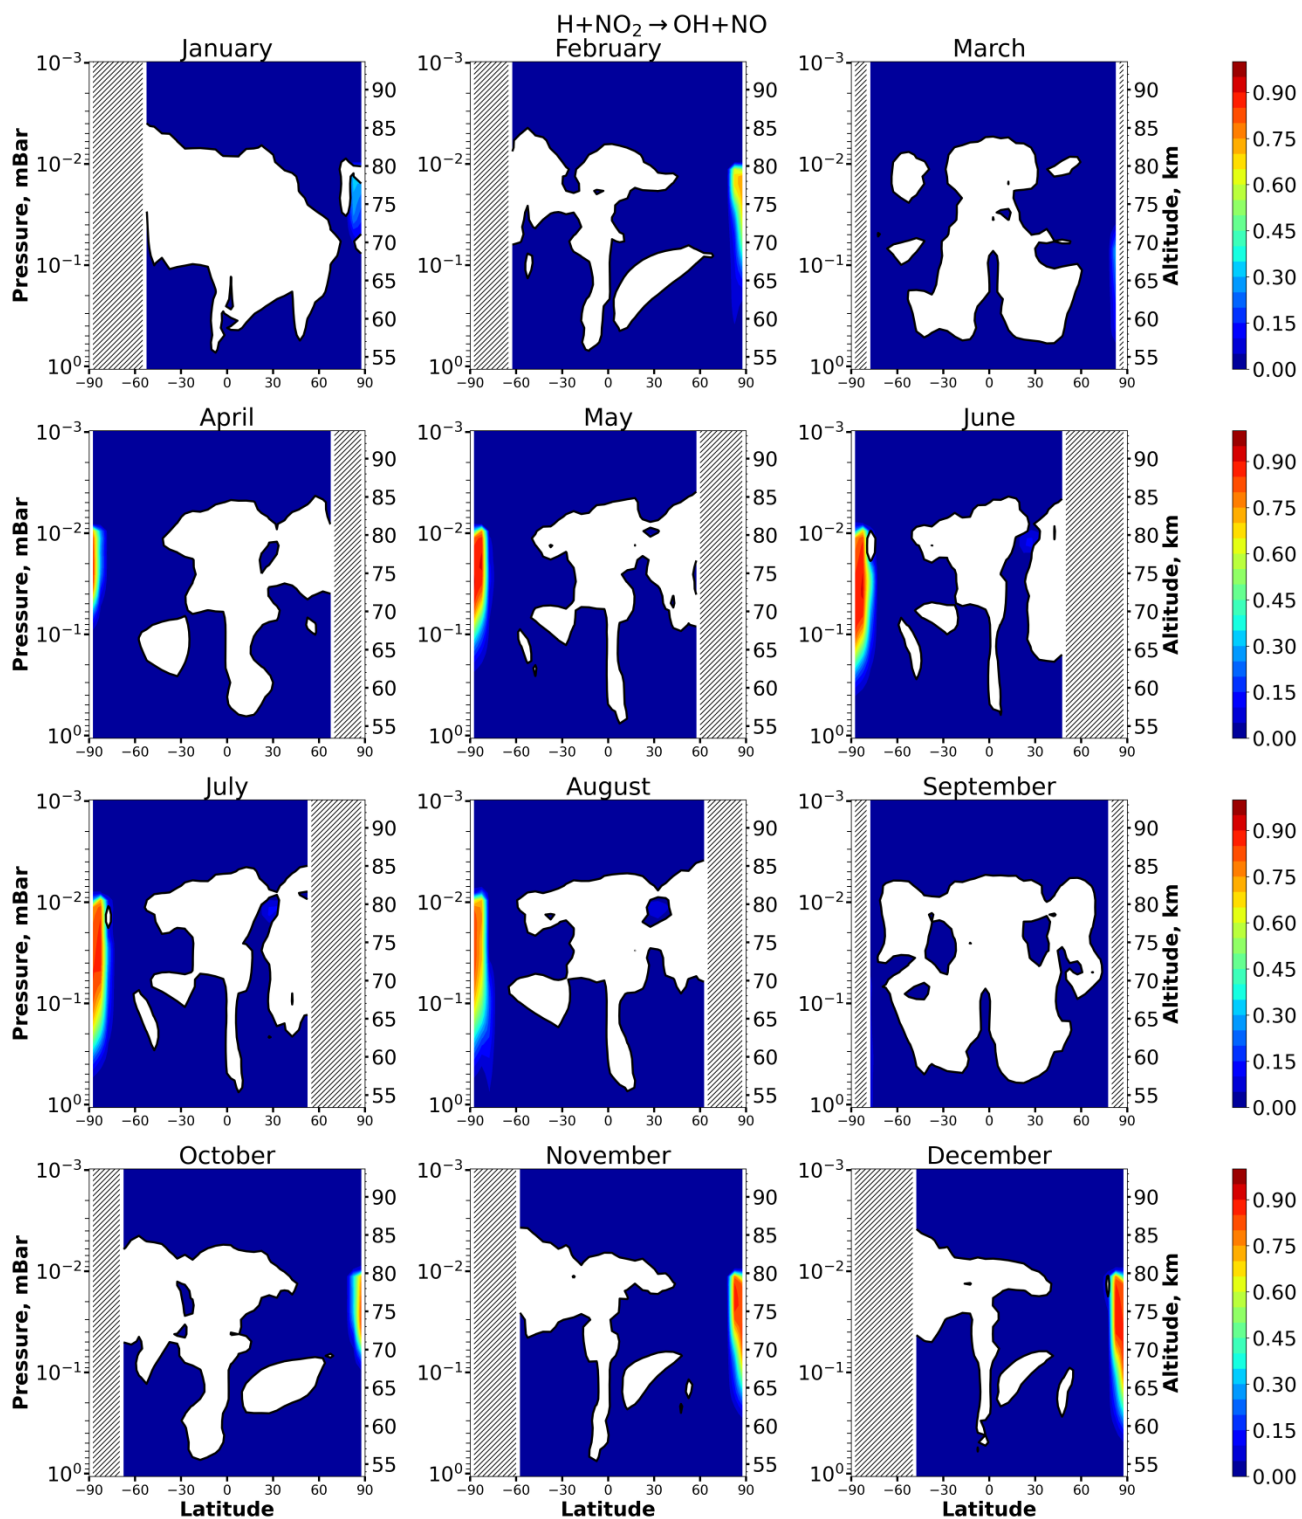

Figure S16. Nighttime mean and monthly averaged relative contribution of the reaction  $\text{H} + \text{NO}_2 \rightarrow \text{OH} + \text{NO}$  to the total source of OH in equilibrium areas. White color indicates nonequilibrium areas of OH.

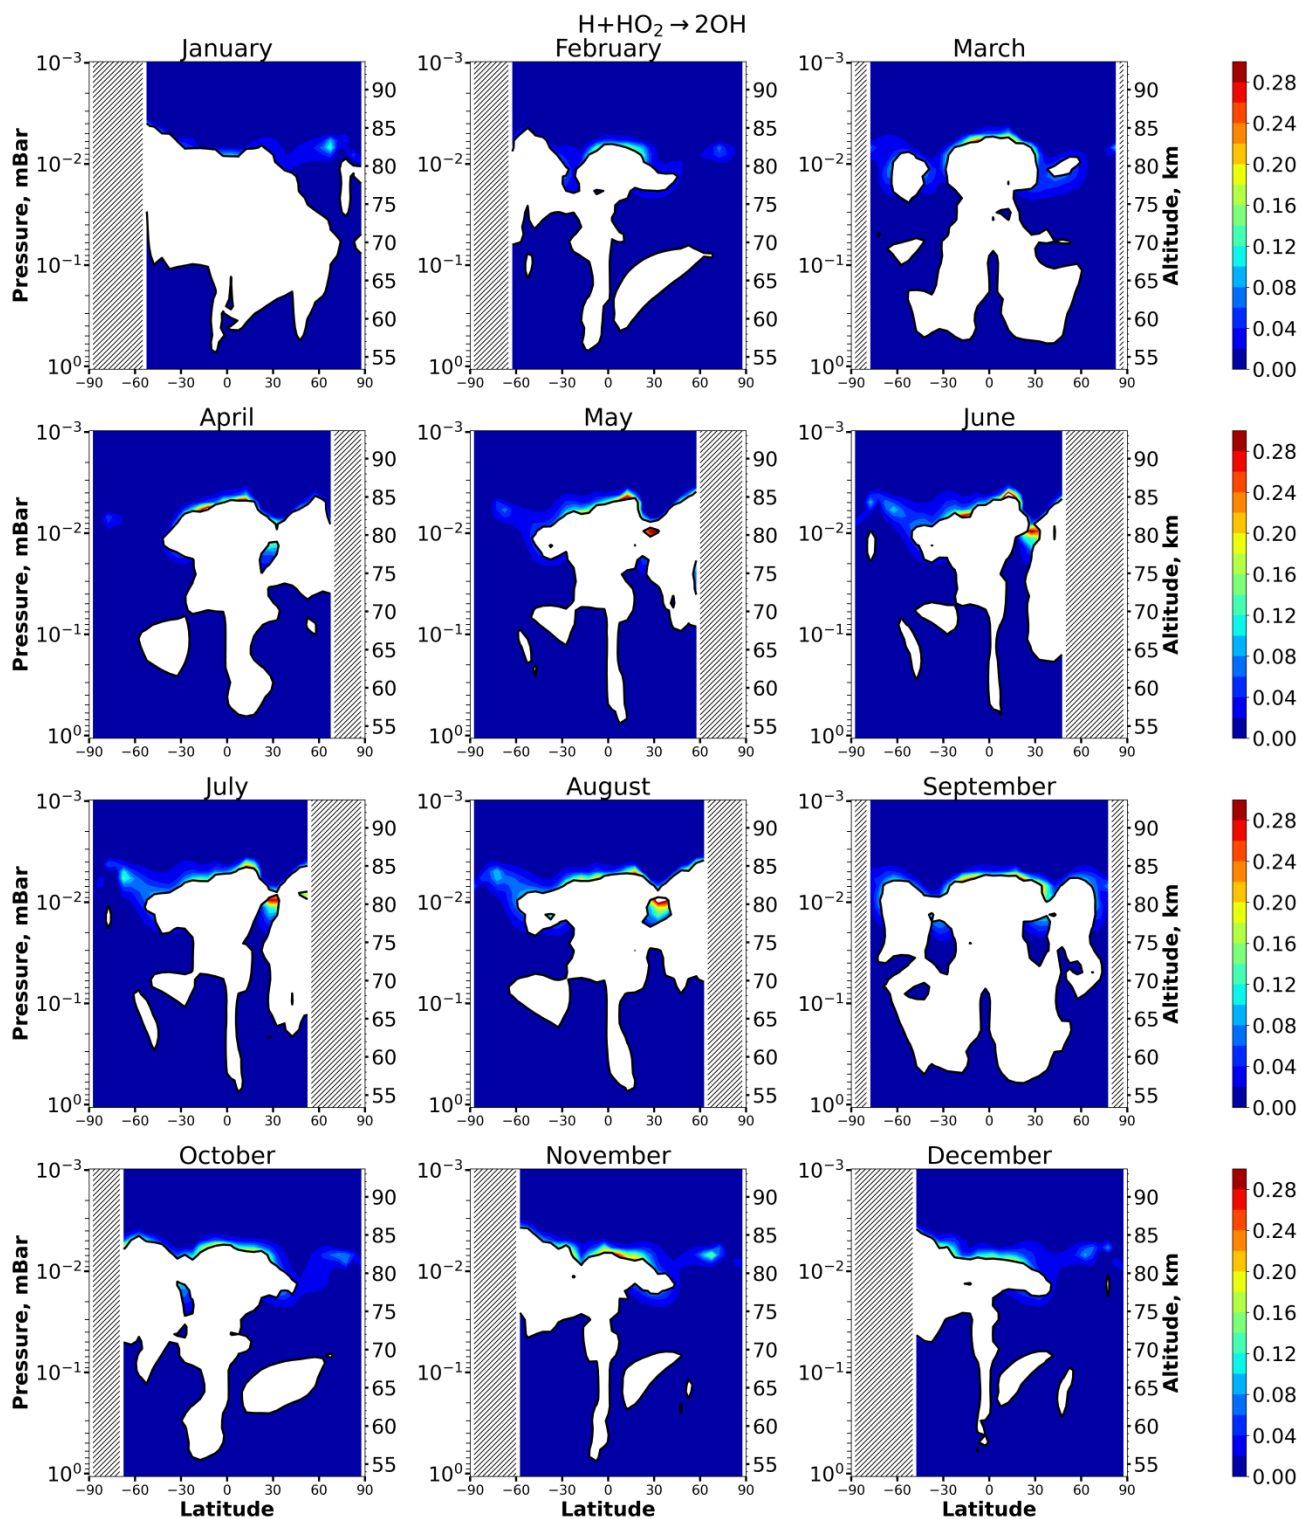

Figure S17. Nighttime mean and monthly averaged relative contribution of the reaction  $\text{H} + \text{HO}_2 \rightarrow 2\text{OH}$  to the total source of OH in equilibrium areas. White color indicates nonequilibrium areas of OH.

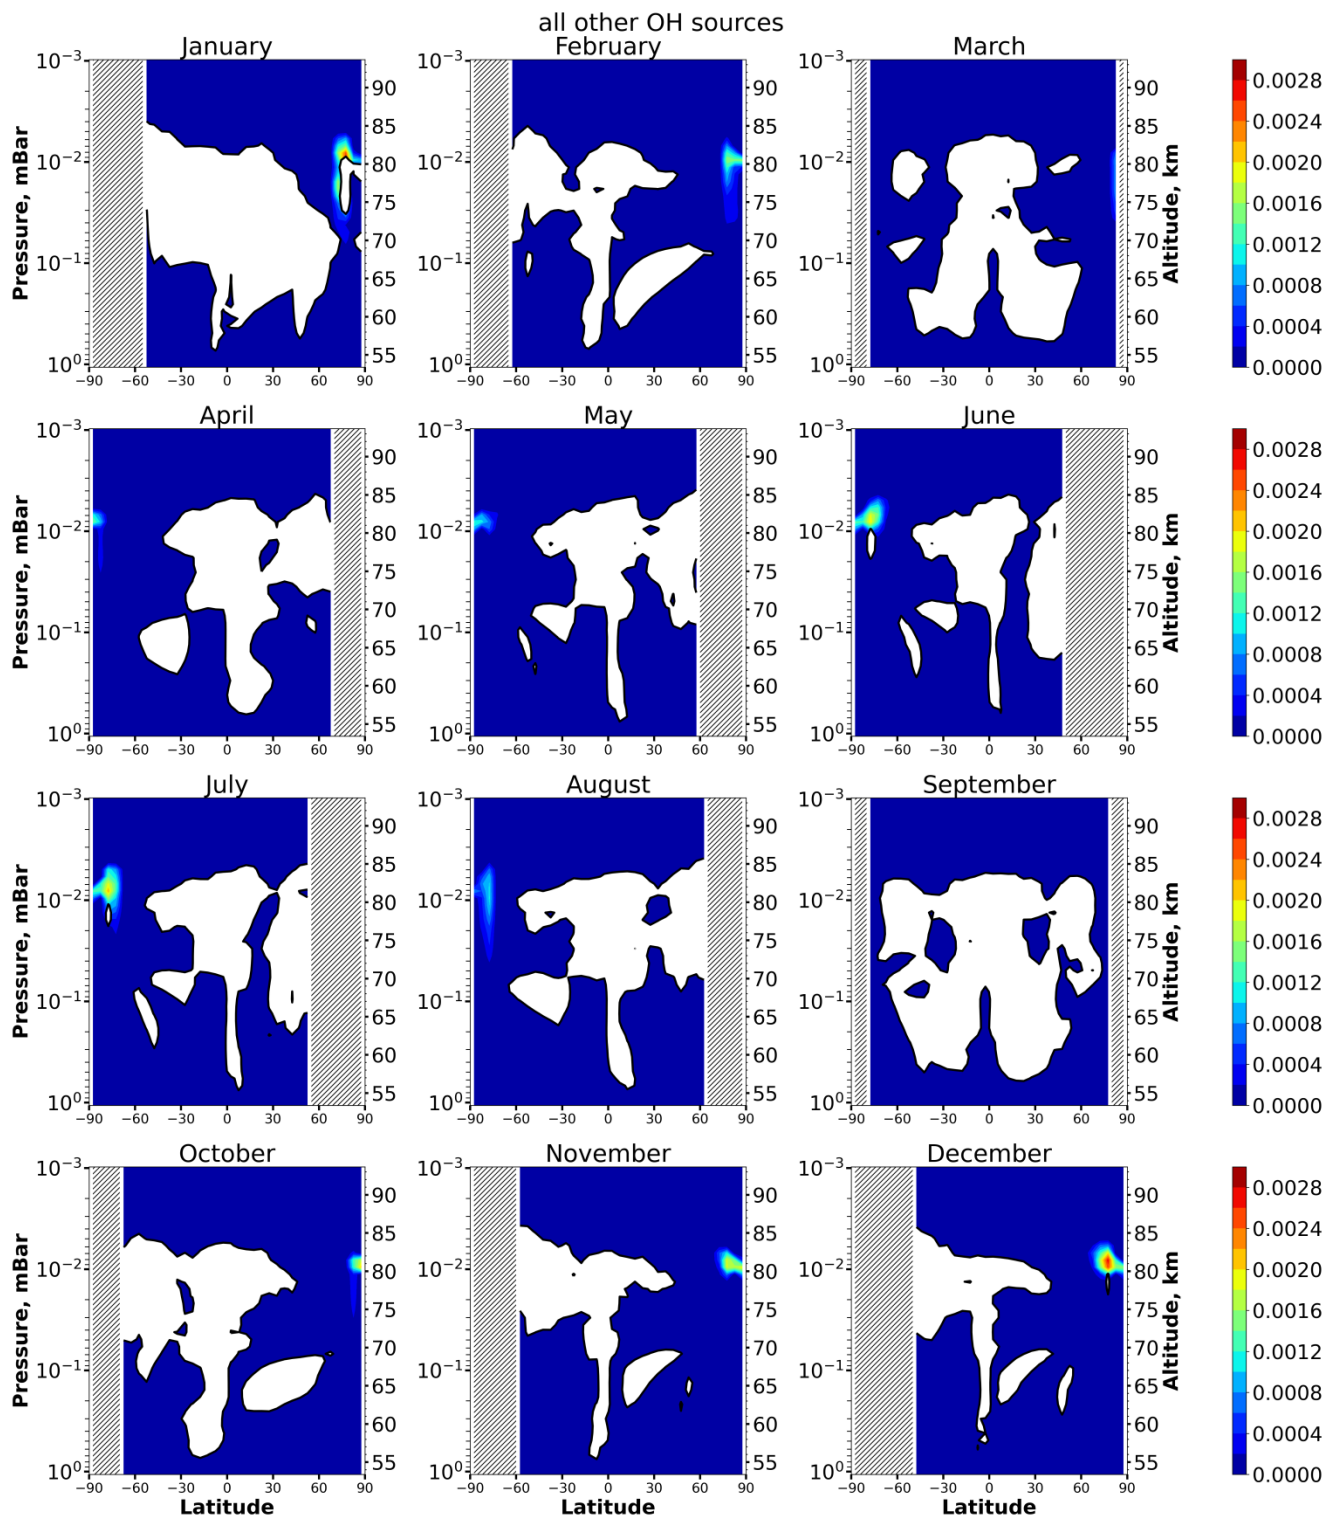

Figure S18. Nighttime mean and monthly averaged relative total contribution of all other reactions ( $\text{H}_2\text{O}_2 + \text{O} \rightarrow \text{OH} + \text{HO}_2$ ,  $\text{H} + \text{NO}_2 \rightarrow \text{OH} + \text{NO}$ ,  $\text{O}(^1\text{D}) + \text{H}_2\text{O} \rightarrow 2\text{OH}$ ,  $\text{O}(^1\text{D}) + \text{H}_2 \rightarrow \text{H} + \text{OH}$ , and  $\text{CH}_4 + \text{O}(^1\text{D}) \rightarrow \text{CH}_3 + \text{OH}$ ) to the total source of OH in equilibrium areas. White color indicates nonequilibrium areas of OH.

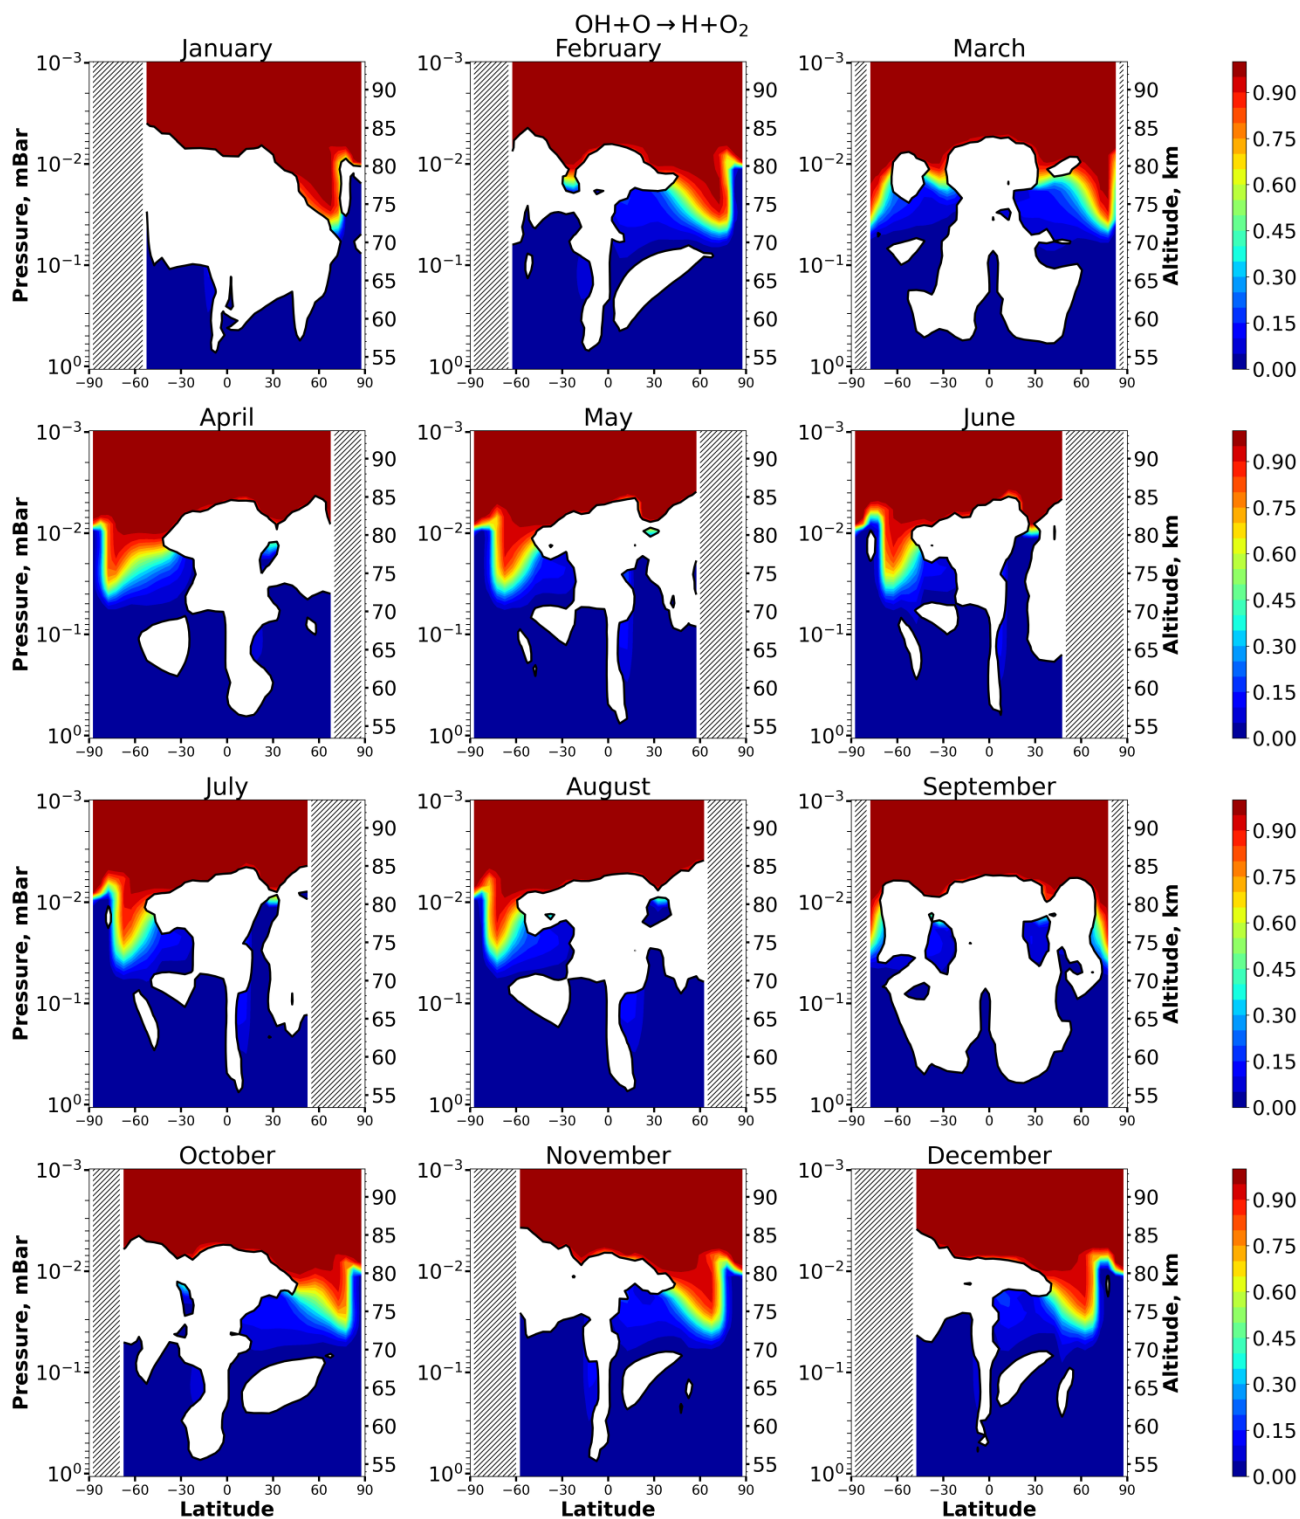

Figure S19. Nighttime mean and monthly averaged relative contribution of the reaction  $\text{OH} + \text{O} \rightarrow \text{H} + \text{O}_2$  to the total sink of OH in equilibrium areas. White color indicates nonequilibrium areas of OH.

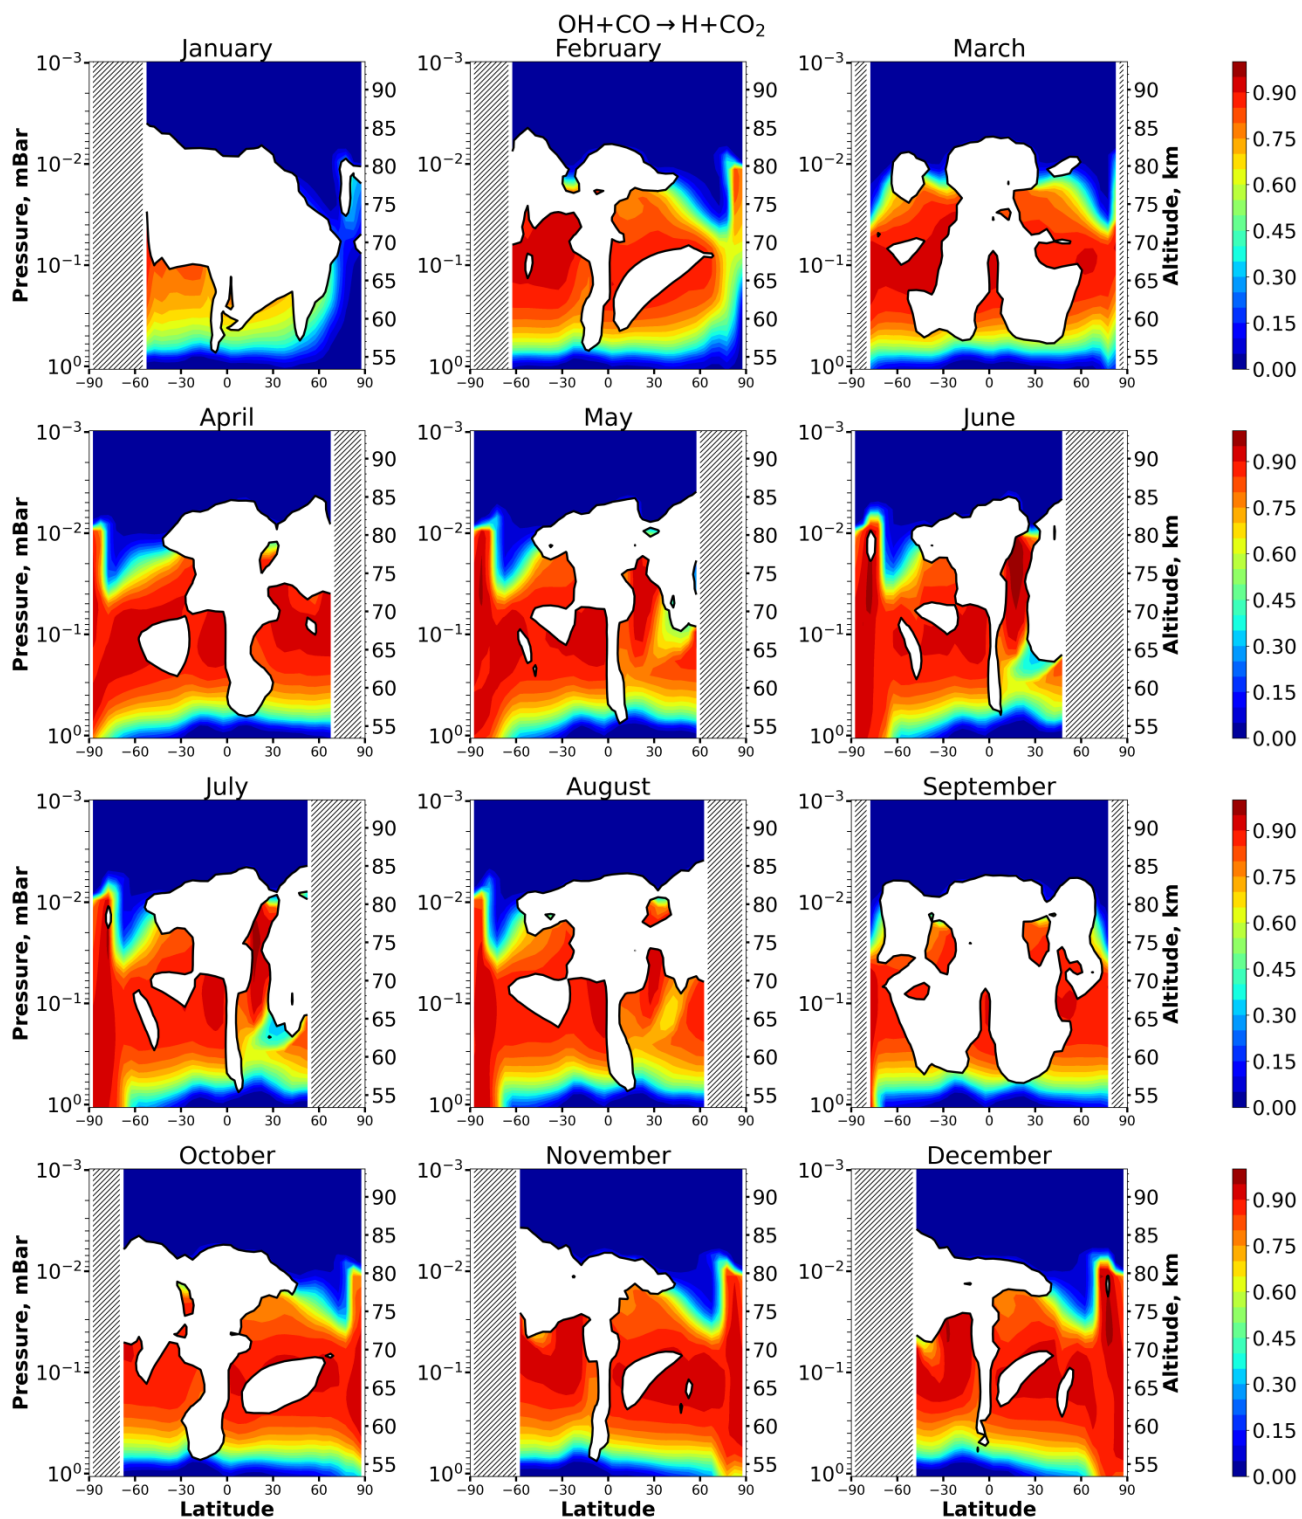

Figure S20. Nighttime mean and monthly averaged relative contribution of the reaction  $\text{OH} + \text{CO} \rightarrow \text{H} + \text{CO}_2$  to the total sink of OH in equilibrium areas. White color indicates nonequilibrium areas of OH.

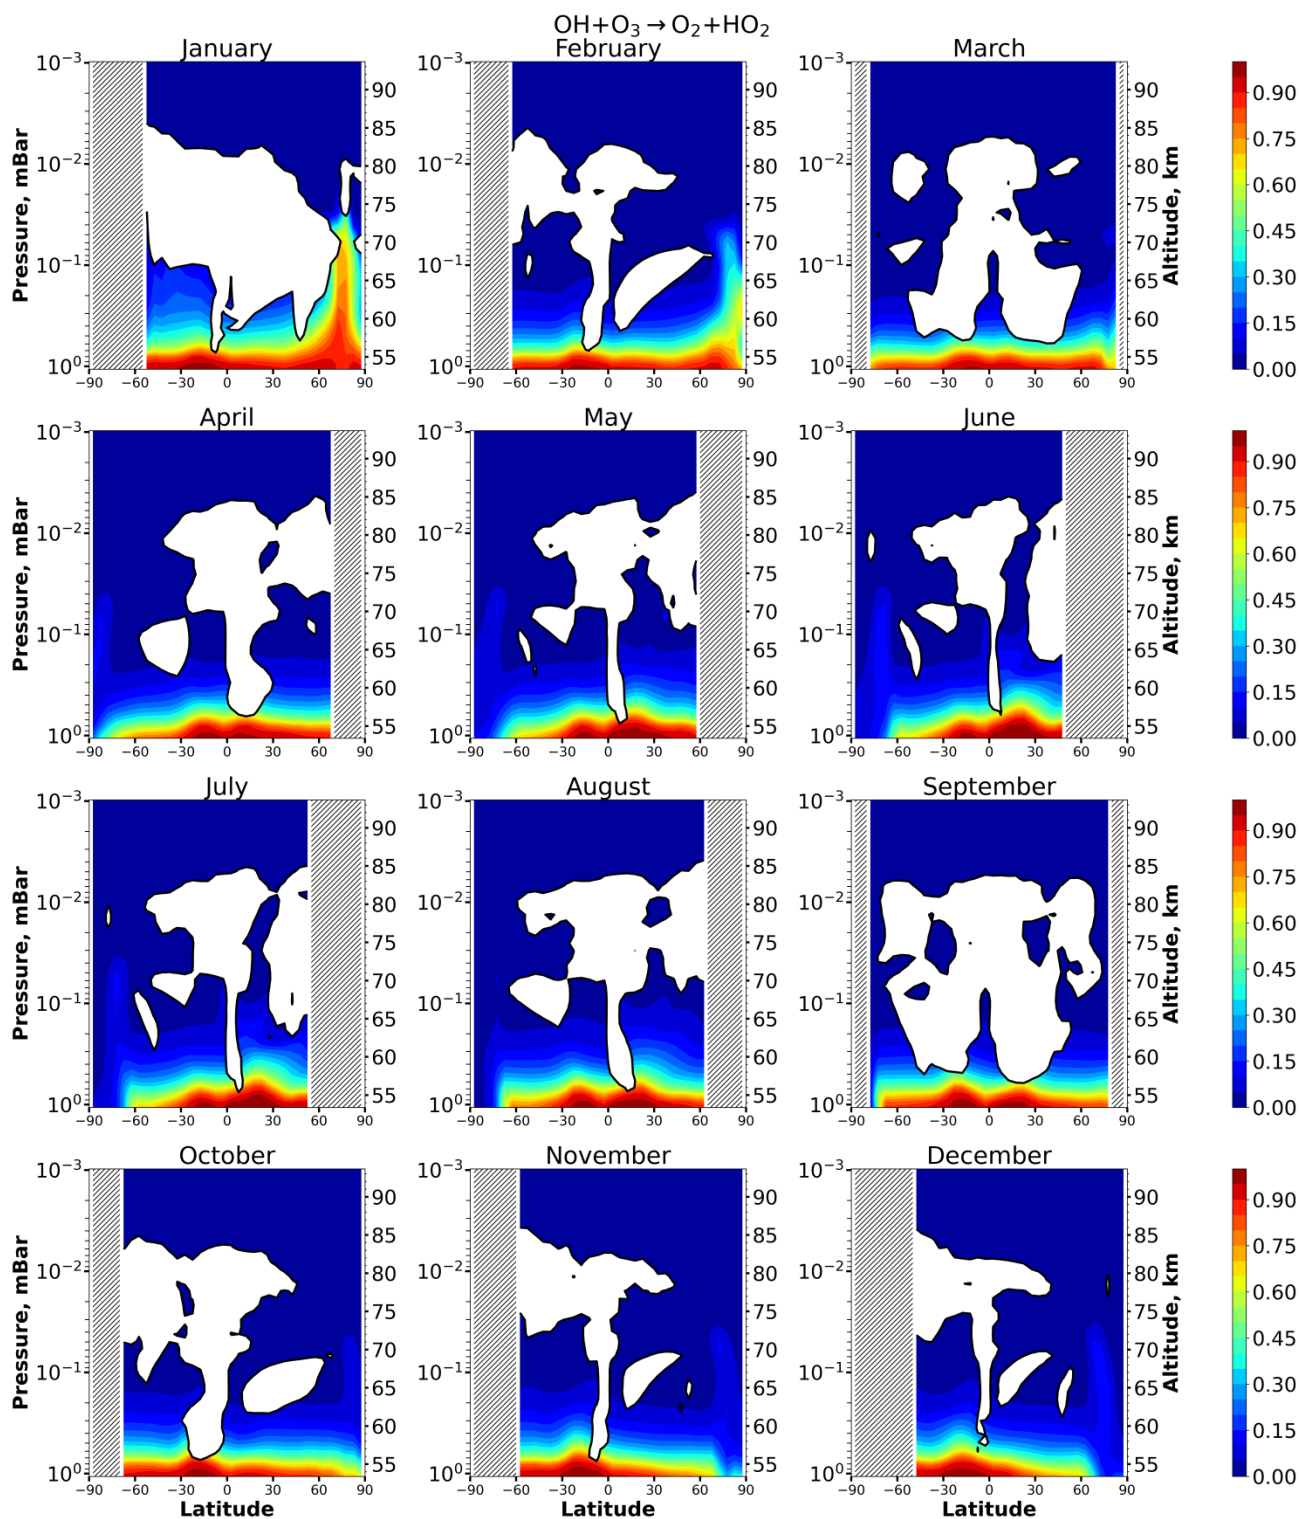

Figure S21. Nighttime mean and monthly averaged relative contribution of the reaction  $\text{OH} + \text{O}_3 \rightarrow \text{O}_2 + \text{HO}_2$  to the total sink of OH in equilibrium areas. White color points nonequilibrium areas of OH.

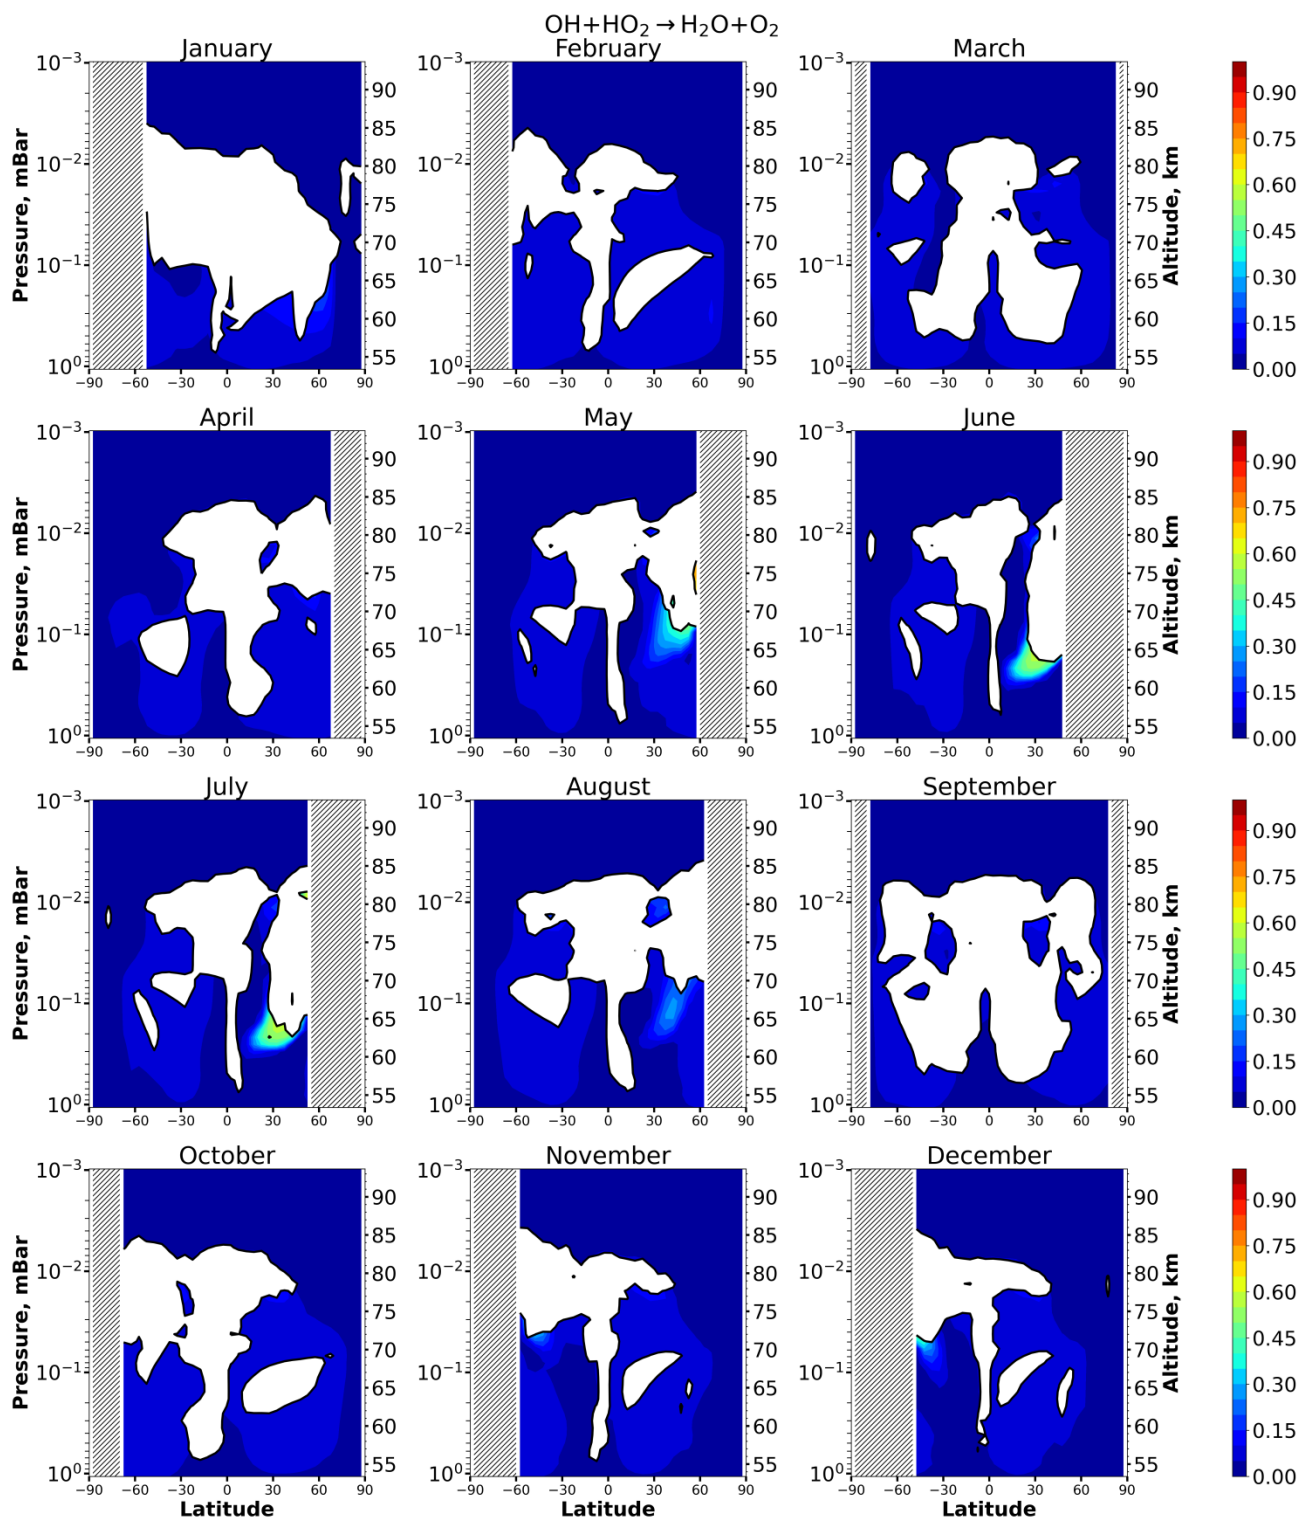

Figure S22. Nighttime mean and monthly averaged relative contribution of the reaction  $\text{OH} + \text{HO}_2 \rightarrow \text{H}_2\text{O} + \text{O}_2$  to the total sink of OH in equilibrium areas. White color indicates nonequilibrium areas of OH.

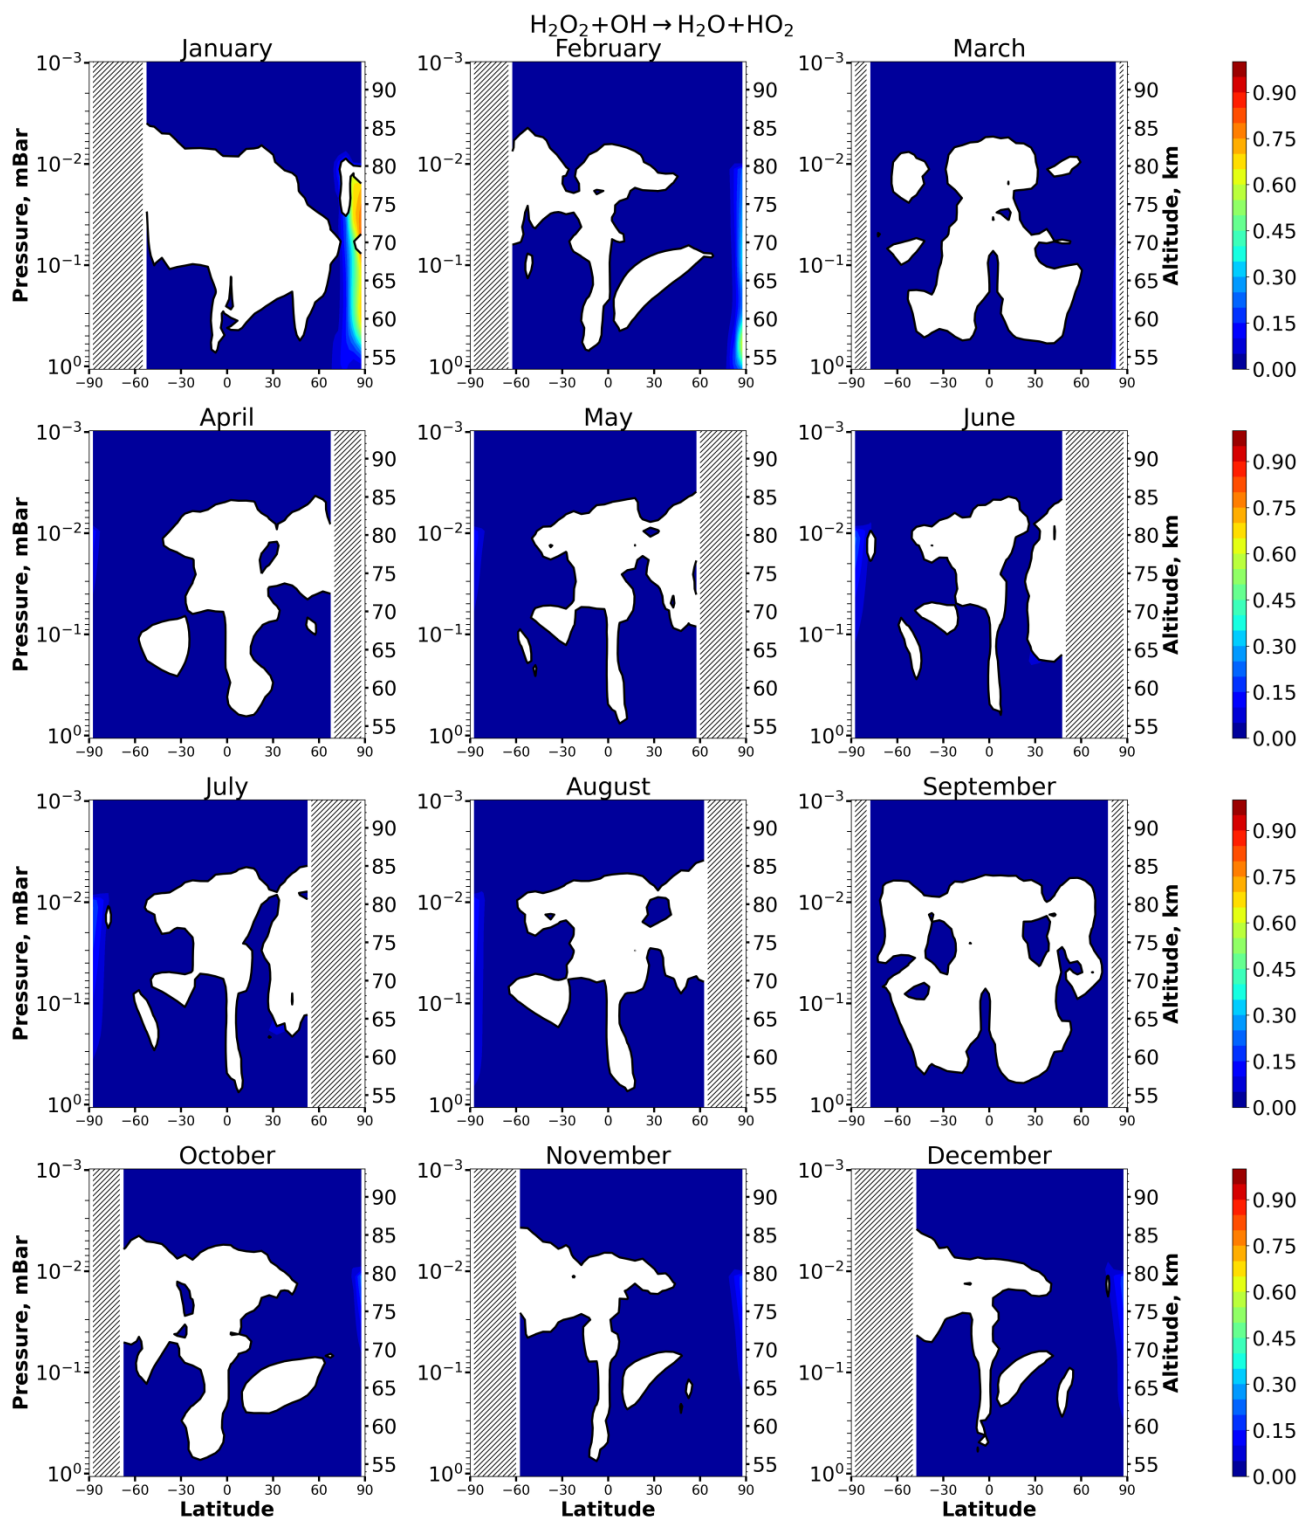

Figure S23. Nighttime mean and monthly averaged relative contribution of the reaction  $\text{H}_2\text{O}_2 + \text{OH} \rightarrow \text{H}_2\text{O} + \text{HO}_2$  to the total sink of OH in equilibrium areas. White color indicates nonequilibrium areas of OH.

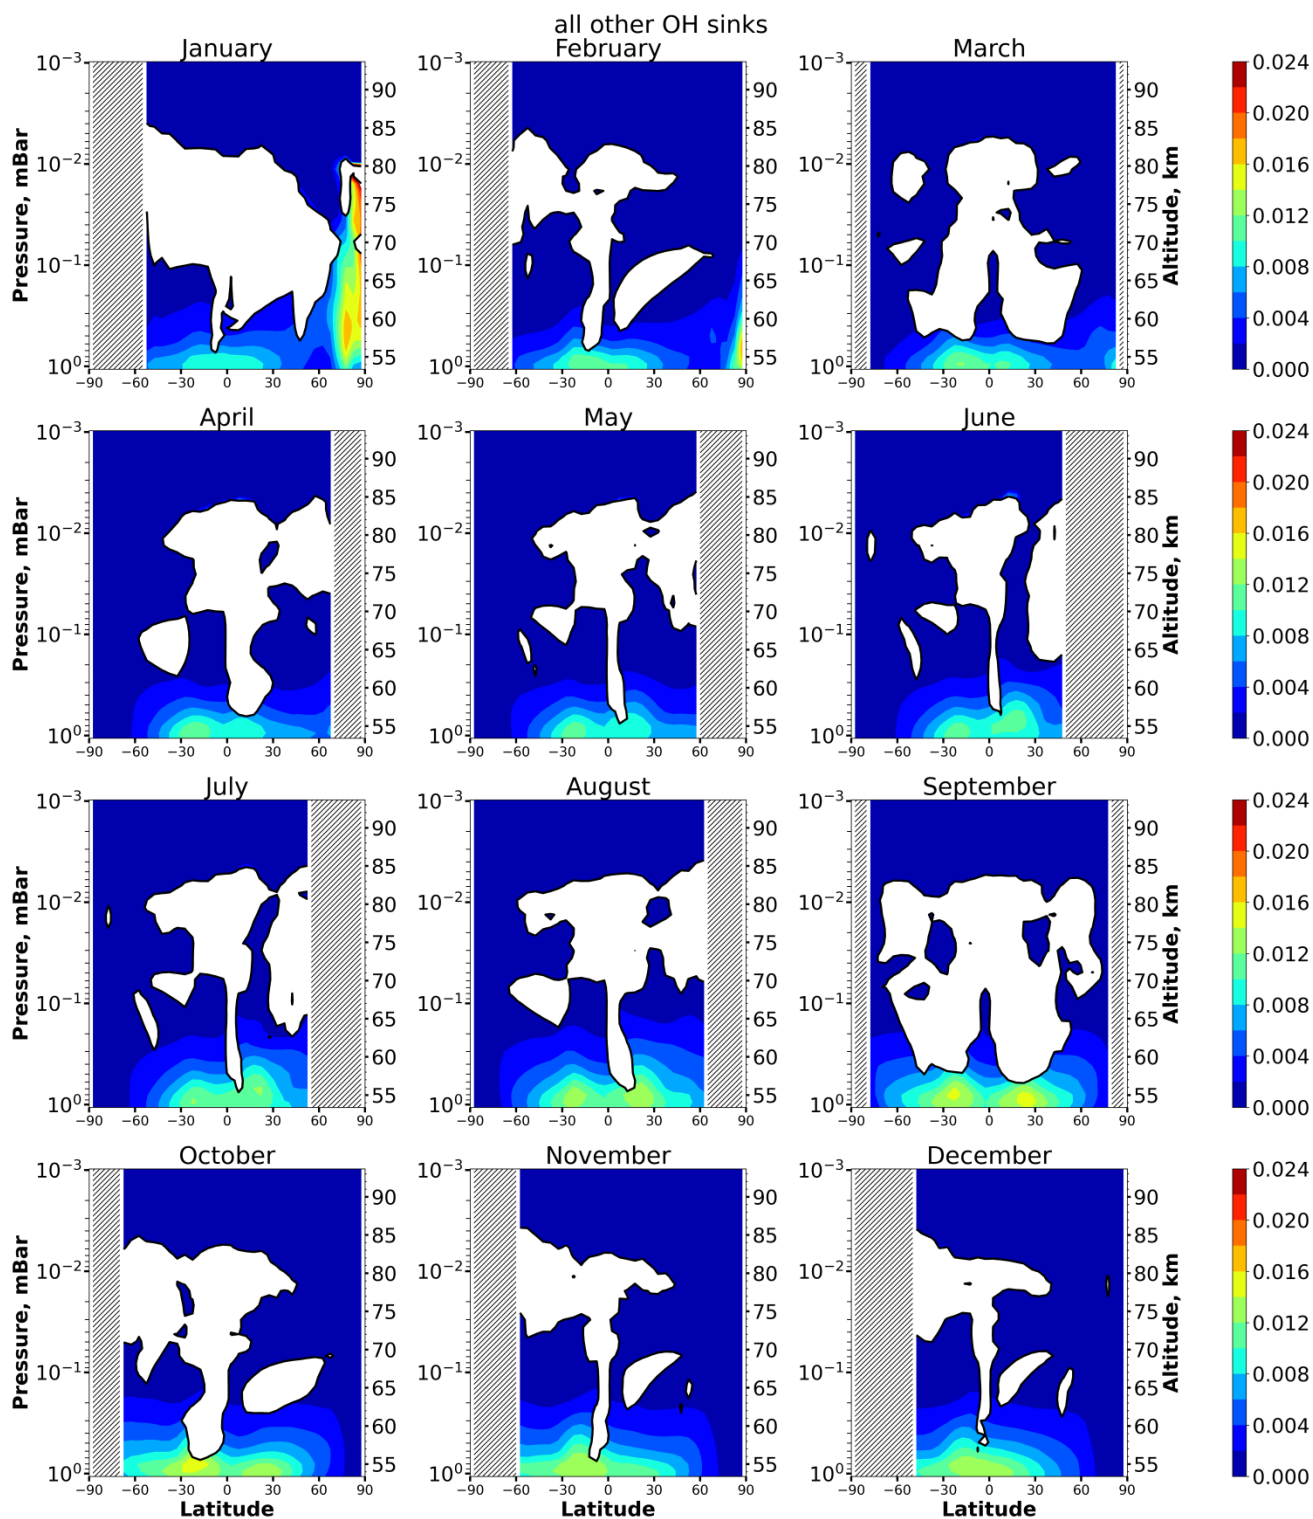

Figure S24. Nighttime mean and monthly averaged relative total contribution of all other reactions (OH+OH  $\rightarrow$  H<sub>2</sub>O+O, OH+OH+M  $\rightarrow$  H<sub>2</sub>O<sub>2</sub>+M, H+OH+N<sub>2</sub>  $\rightarrow$  H<sub>2</sub>O+N<sub>2</sub>, CH<sub>4</sub>+OH  $\rightarrow$  CH<sub>3</sub>+H<sub>2</sub>O, OH+H<sub>2</sub>  $\rightarrow$  H<sub>2</sub>O+H, and N+OH  $\rightarrow$  NO+H) to the total sink of OH in equilibrium areas. White color indicates nonequilibrium areas of OH.

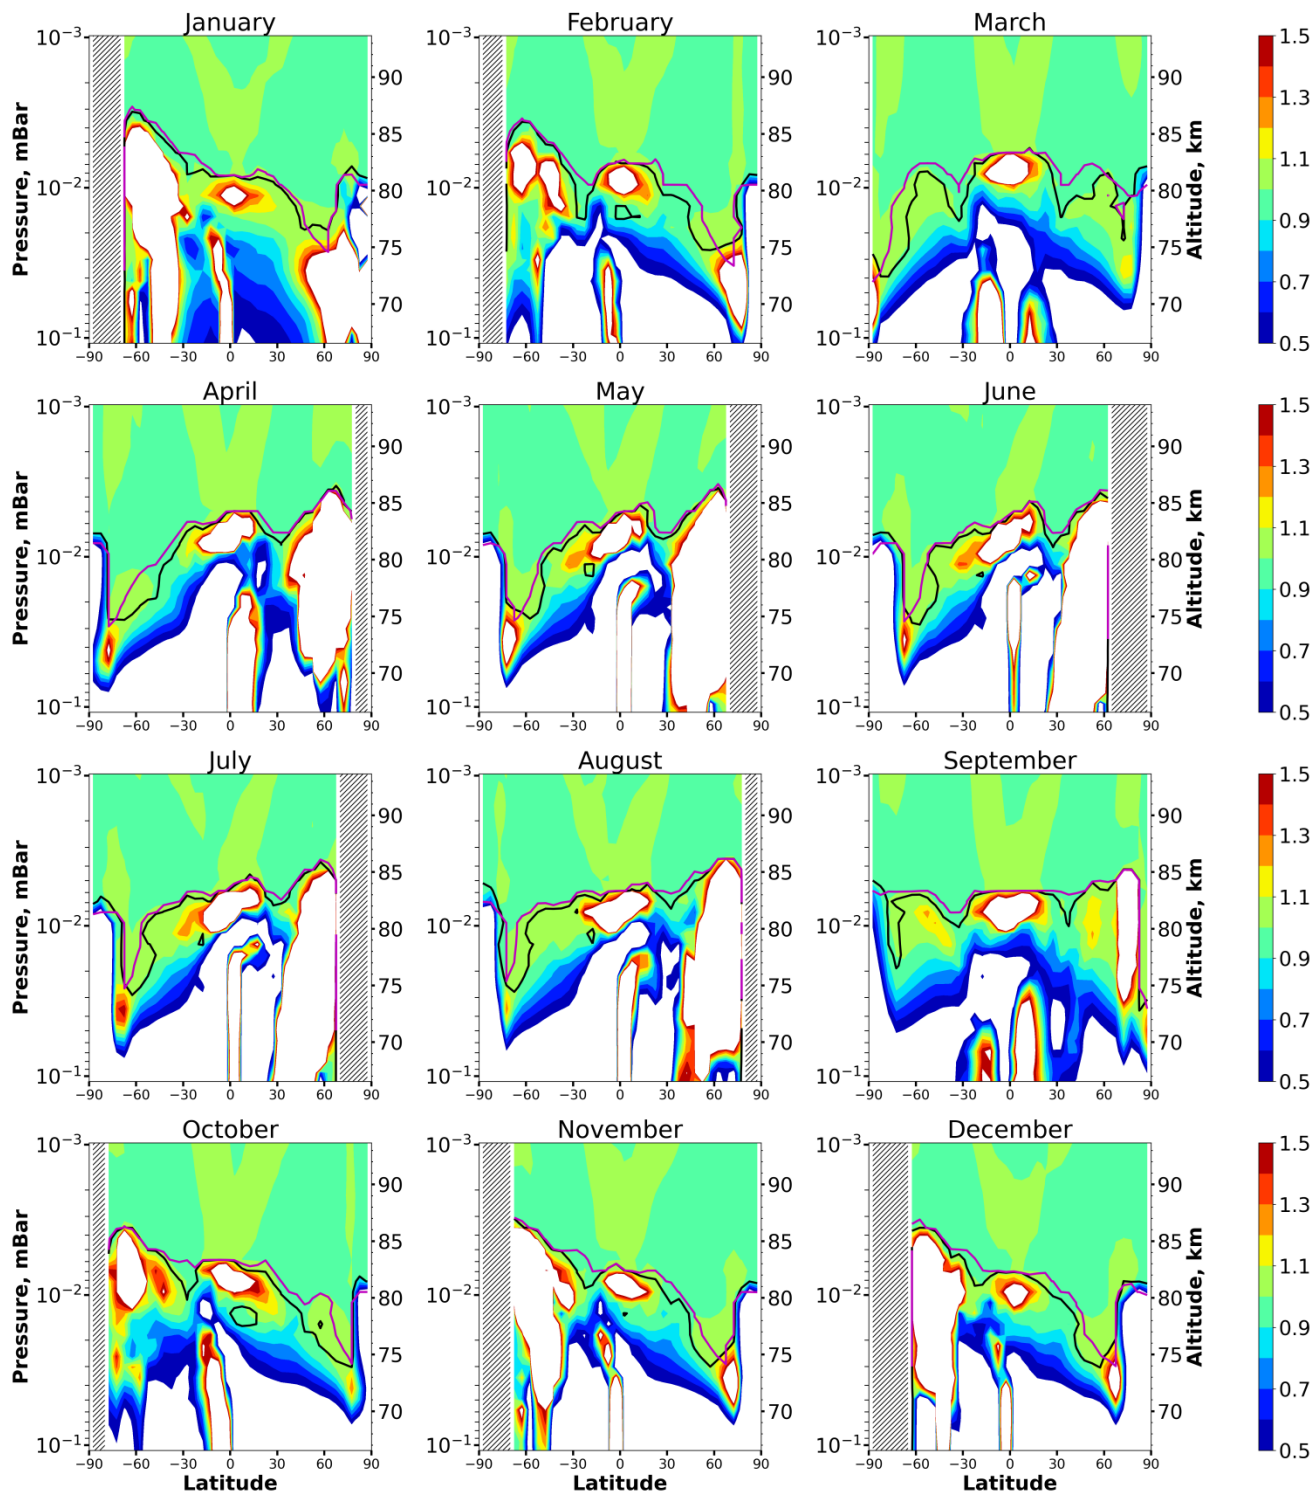

Figure S25. Figure 5 from the paper but with the threshold for the nighttime solar zenith angle is changed to  $95^\circ$ .

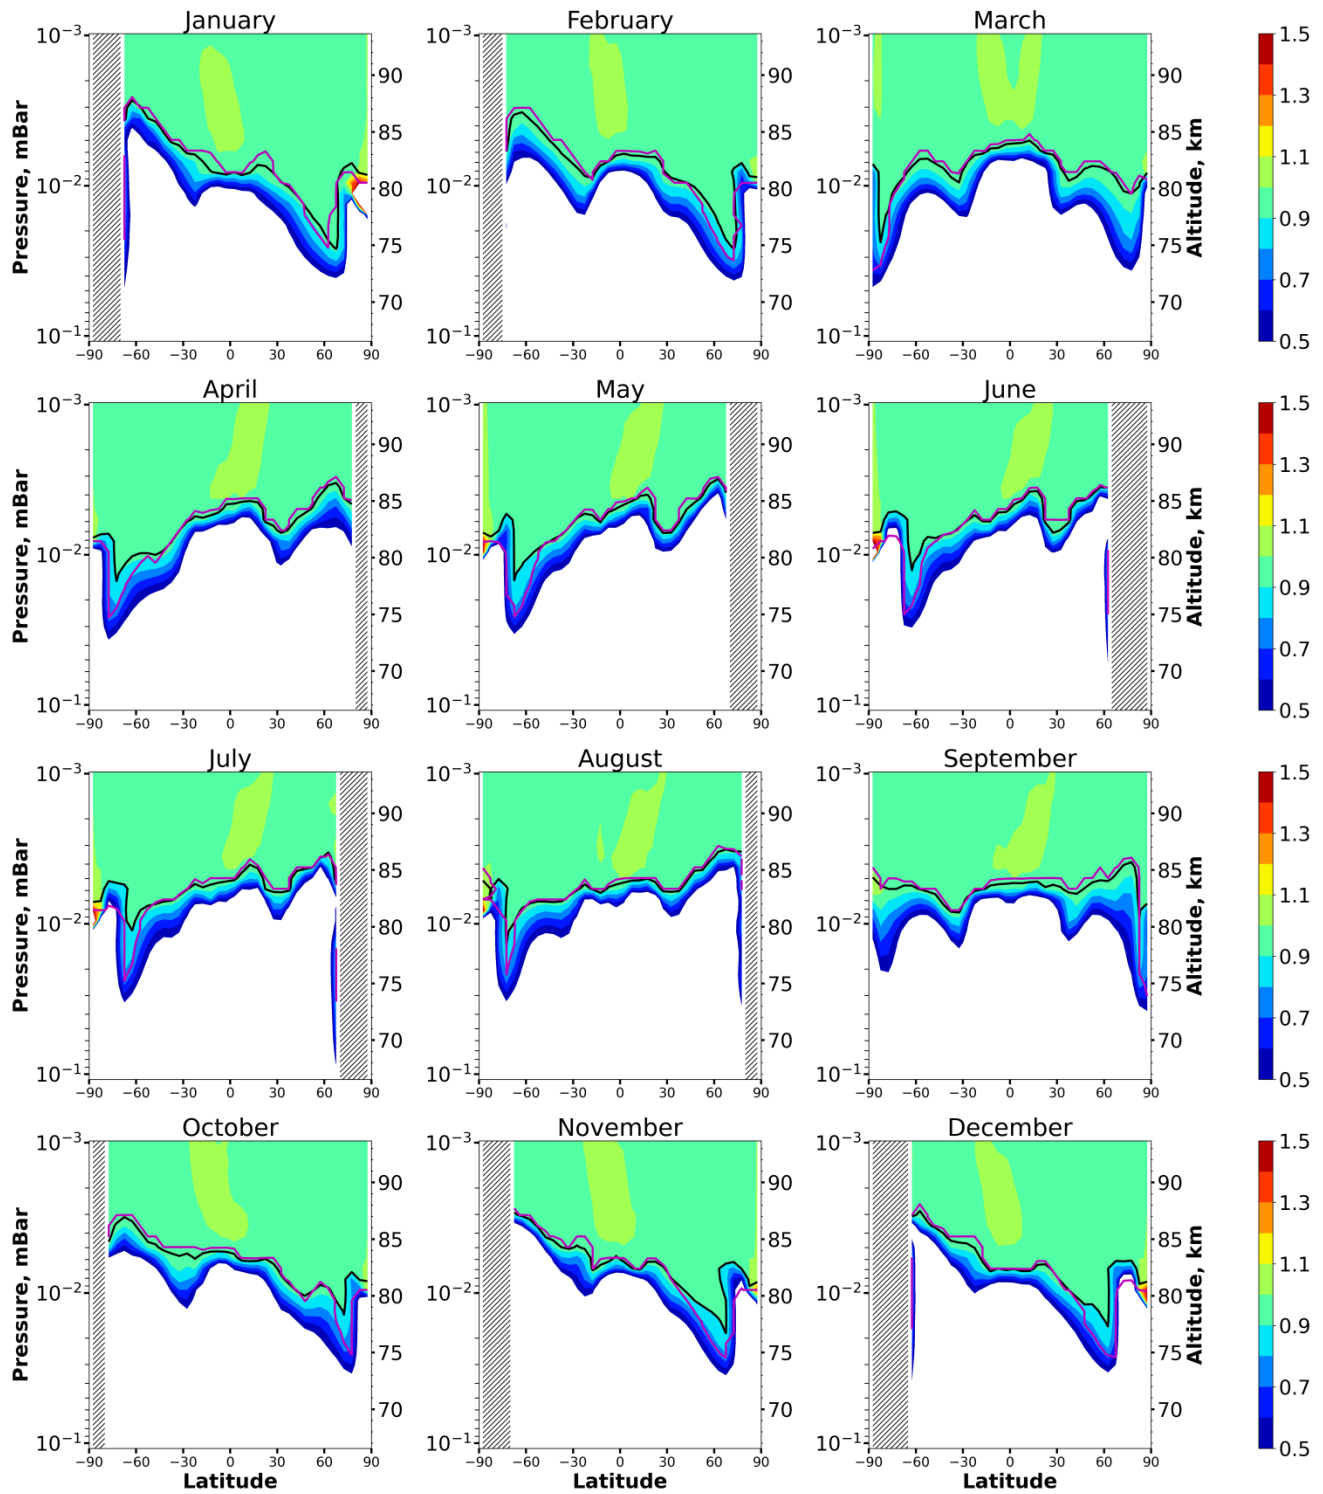

Figure S26. Figure 6 from the paper but with the threshold for the nighttime solar zenith angle is changed to  $95^\circ$ .

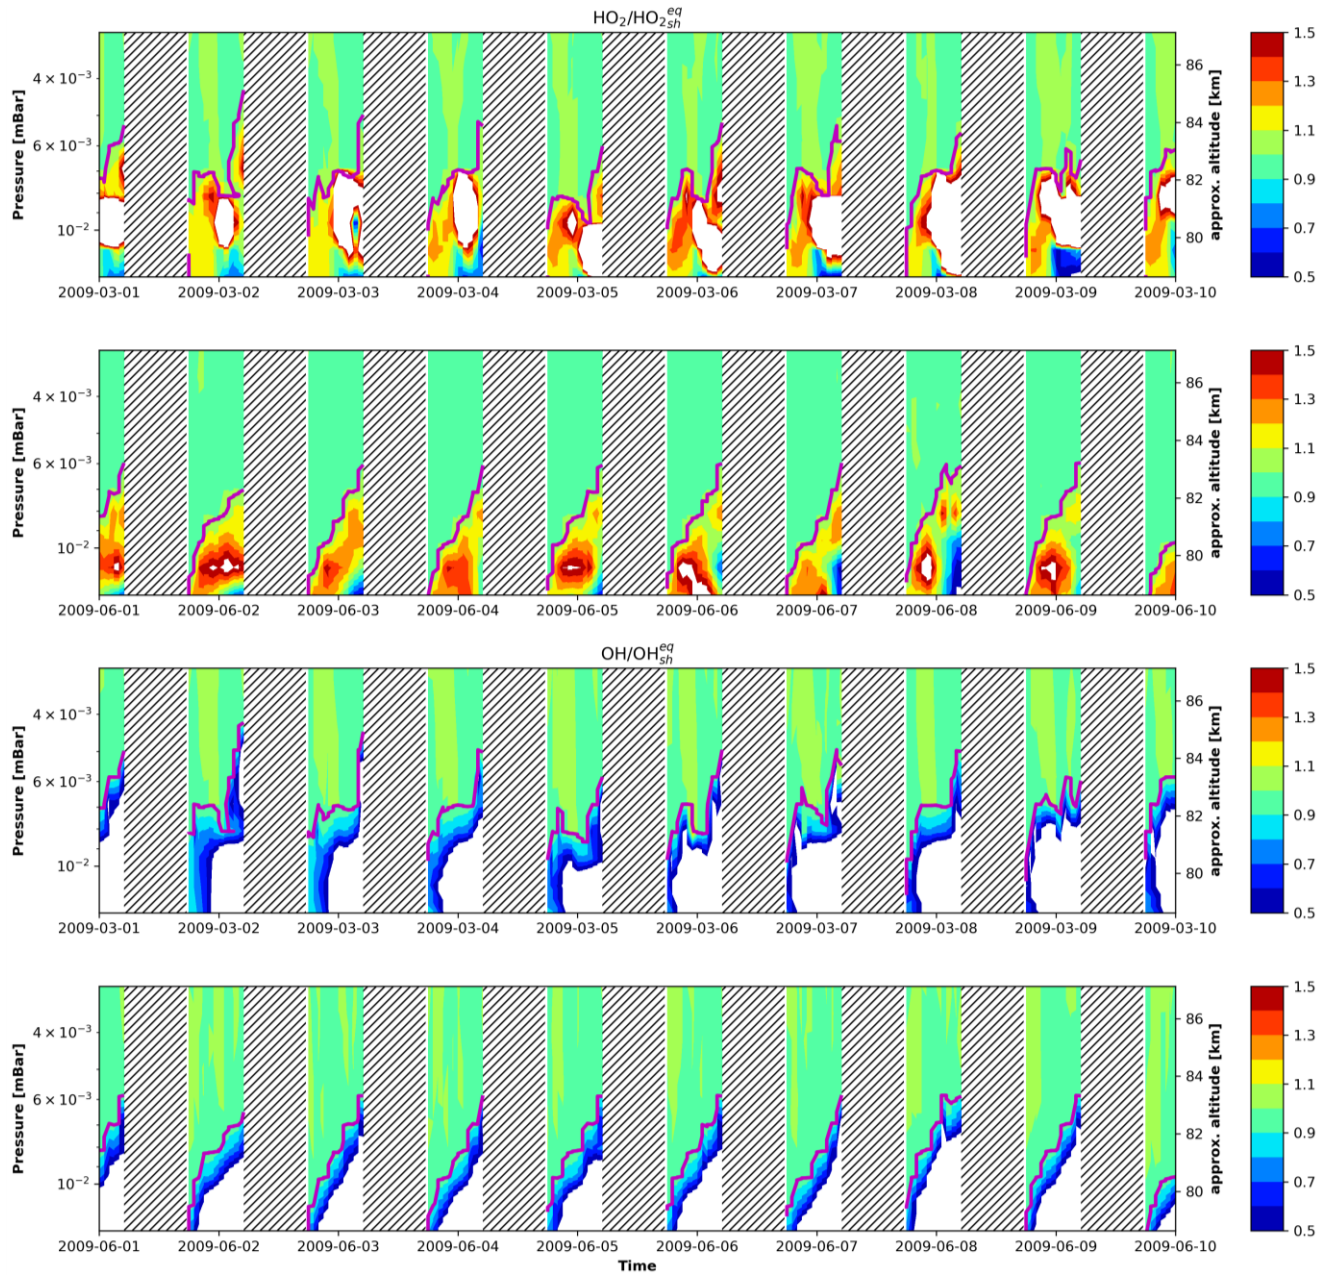

Figure S27.  $HO_2/HO_2^{eq}$  and  $OH/OH^{eq}$  time-height variations above the Equator (2.8°S, 0°W) in March and June 2009 calculated with the use of the temperature and winds distributions from the Canadian Middle Atmosphere Model. The stippling shows daytime. The white area represents the  $HO_2/HO_2^{eq}$  and  $OH/OH^{eq}$  ratios outside the [0.5, 1.5] interval. Magenta lines indicate the boundary of  $HO_2$  and  $OH$  equilibrium according to criteria (17) and (25) ( $Crit_{HO_2} = 0.1$  and  $Crit_{OH} = 0.1$ ).

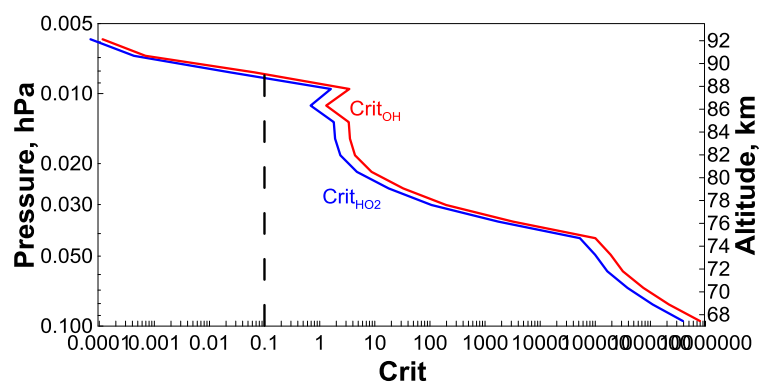

Figure S28. The examples of height-dependence of  $\text{Crit}_{\text{HO}_2}$  and  $\text{Crit}_{\text{OH}}$ .
